# Supplementary material for: Loneliness, coping, suicidal thoughts and self-harm during the COVID-19 pandemic: a repeat cross-sectional UK population survey
Source: HighWire-hosted journal article supplement (doi:10.1136/bmjopen-2020-048123), 2021-12-01
Supplement: bmjopen-2020-048123supp001_data_supplement.pdf [file bmjopen-2020-048123supp001_data_supplement.pdf]

## Suppl. Methods

### *Sampling of Participants and Weighting*

E-mails were sent to panellists selected at random from the base sample. The e-mail invited them to take part in a survey and provided a generic survey link. Once a panel member clicked on the link, they were sent to the survey that they were most suited for, according to the sample definition and quotas (non-probability sampling). Invitations to surveys did not expire and respondents could be sent to any available survey. In our study, quotas were based age, sex, education level, social grade and the UK's four nation population profile. The profile was derived from ONS census data and the National Readership Survey [1].

### *Sociodemographic Variables*

Demographic variables contained categorical variables of sex (male and female), age (18-34, 35-44, 45-54 and  $\geq 55$  years) and marital status (married/civil partnership, living as married, separated/divorced, widowed, never married; and not known). Socio-economic variables consisted of a variable of social grade, dichotomised into ABC1 and C2DE categories generally representing individuals with higher and lower socio-economic status respectively [1]. We also categorised participants working status as employed (included both full-time and part-time), unemployed, not working/others, full-time student and retired. We included two household-level categorical variables that 1) dichotomised whether a participant was a parent/guardian and 2) documented the number of children in the household (0, 1, 2, 3+, refused to answer).

### *Additional Variables Available from Wave 3*

Starting from wave 3 (Suppl. Table 1), participants who were employed were further categorised into two sub-groups as being or not being furloughed. This resulted in a combined single categorical variable of working and furlough status with the categories of employed (not furloughed), employed (furloughed), unemployed, not working/others, full-time student and retired) for wave 3 and 4 only. We identified individuals with any pre-existing mental health conditions or psychiatric diagnosis at the time of the survey. They were asked 'Do you have a current pre-existing mental health condition or psychiatric diagnosis?' and participants could respond 'Yes', 'No', 'Don't know', 'Prefer not to say' and 'Refused'. A set of non-mutually exclusive binary variables were introduced to assess living arrangements: living alone, with spouse/partner, with friend(s)/housemate(s), with parent(s), with sibling(s), with child(ren)  $\geq 18$  years, with child(ren)  $< 18$  years, with other adult family members and with grandchild(ren). We recoded these living arrangements variables into four binary

variables as 1) living alone (as original), 2) living with spouse/partner (as original), 3) living with relative(s) by combining living with parent(s), sibling(s), child(ren)  $\geq 18$  years, child(ren)  $< 18$  years, other adult family members and grandchild(ren) and 4) living with friend(s)/housemate(s). We also included a categorical variable from wave 3 to assess whether a participant lived in urban, town/fringe, or urban areas (Suppl. Table 1).

### *Sensitivity Analysis*

We carried out a sensitivity analysis to test the robustness of our results by conducting regression modelling on the combined data from wave 2, wave 3 and wave 4 where both suicidal thoughts and self-harm outcomes were available (Suppl. Table 1). However, we could not include variables for pre-existing mental health conditions, living arrangements and area characteristics in the sensitivity analysis due to data unavailability. The same modelling specifications as in the main analysis was adopted in the sensitivity analysis with time variable including wave 2, wave 3 and wave 4. Due to zero counts of self-harm in the coping subgroup found at wave 2 (Fig. 3G and Suppl. Table 7), we omitted the wave-by-coping interaction term in the regression for self-harm in the sensitivity analysis.

### **References**

- 1 National Readership Survey. Social Grade. 2020.<http://www.nrs.co.uk/nrs-print/lifestyle-and-classification-data/social-grade/> (accessed 15 Jul 2020).

Suppl. Table 1. Summary of list of variables available for data analysis for each wave of data collection and item non-response rate.

|                                  |                                                  | Wave 1 (17-18/03/2020) n = 2,126<br>(2,126.0) <sup>a</sup> |                      |                    |               | Wave 2 (02-03/04/2020) n = 2,221<br>(2,221.0) <sup>a</sup> |                      |                    |               | Wave 3 (24-26/04/2020) n = 4,246<br>(4,246.0) <sup>a</sup> |                      |                    |               | Wave 4 (28-29/05/2020) n = 4,382<br>(4,382.0) <sup>a</sup> |                      |                    |               |
|----------------------------------|--------------------------------------------------|------------------------------------------------------------|----------------------|--------------------|---------------|------------------------------------------------------------|----------------------|--------------------|---------------|------------------------------------------------------------|----------------------|--------------------|---------------|------------------------------------------------------------|----------------------|--------------------|---------------|
|                                  |                                                  | Item non-response <sup>b</sup>                             |                      |                    |               | Item non-response <sup>b</sup>                             |                      |                    |               | Item non-response <sup>b</sup>                             |                      |                    |               | Item non-response <sup>b</sup>                             |                      |                    |               |
|                                  |                                                  | Available?                                                 | Unweighted<br>counts | Weighted<br>counts | Weighted<br>% |
| Outcomes                         | Suicidal thoughts                                | No                                                         | -                    | -                  | -             | Yes                                                        | 116                  | 124.5              | 5.6           | Yes                                                        | 277                  | 287.6              | 6.8           | Yes                                                        | 234                  | 247.2              | 5.6           |
|                                  | Self-harm                                        | No                                                         | -                    | -                  | -             | Yes                                                        | 104                  | 109.9              | 4.9           | Yes                                                        | 249                  | 257.6              | 6.1           | Yes                                                        | 214                  | 225.8              | 5.2           |
| Main covariates                  | Loneliness                                       | Yes                                                        | 0                    | 0.0                | 0.0           |
|                                  | Coping                                           | No                                                         | -                    | -                  | -             | Yes                                                        | 57                   | 62.0               | 2.8           | Yes                                                        | 111                  | 114.1              | 2.7           | Yes                                                        | 92                   | 101.9              | 2.3           |
| Individual-level<br>demographics | Sex                                              | Yes                                                        | 0                    | 0.0                | 0.0           |
|                                  | Age                                              | Yes                                                        | 0                    | 0.0                | 0.0           |
| Socioeconomic<br>status (SES)    | Marital status                                   | Yes                                                        | 14                   | 13.2               | 0.6           | Yes                                                        | 15                   | 16.9               | 0.8           | Yes                                                        | 17                   | 19.4               | 0.5           | Yes                                                        | 30                   | 33.0               | 0.8           |
|                                  | Social grade                                     | Yes                                                        | 0                    | 0.0                | 0.0           |
|                                  | Working Status                                   | Yes                                                        | 0                    | 0.0                | 0.0           |
|                                  | Mental health condition/Psychiatric<br>diagnosis | No                                                         | -                    | -                  | -             | No                                                         | -                    | -                  | -             | Yes                                                        | 290                  | 297.8              | 7.0           | Yes                                                        | 251                  | 267.9              | 6.1           |
| Household-level<br>factors       | Being parent/guardian                            | Yes                                                        | 0                    | 0.0                | 0.0           |
|                                  | Number of children in household                  | Yes                                                        | 35                   | 33.8               | 1.6           | Yes                                                        | 59                   | 62.1               | 2.8           | Yes                                                        | 84                   | 88.7               | 2.1           | Yes                                                        | 73                   | 82.0               | 1.9           |
|                                  | Living arrangements                              | No                                                         | -                    | -                  | -             | No                                                         | -                    | -                  | -             | Yes                                                        | 0                    | 0.0                | 0.0           | Yes                                                        | 0                    | 0.0                | 0.0           |
| Area factors                     | Urban/Rural area                                 | No                                                         | -                    | -                  | -             | No                                                         | -                    | -                  | -             | Yes                                                        | 128                  | 112.6              | 2.7           | Yes                                                        | 116                  | 116.3              | 2.7           |

<sup>a</sup> Weighted based<sup>b</sup> Item non-response included skipped answers, 'prefer not to say', 'don't know', 'refuse to answer' and 'none of these' responses

Suppl. Table 1A. Cross-tabulation between pre-existing mental health condition/psychiatric diagnosis and outcomes of the study with item non-response categories.

| Wave   | Outcome           | Category of<br>Mental health condition/<br>Psychiatric diagnosis | Category of outcome |                      |        |                     |                      |        |                                |                      |        |
|--------|-------------------|------------------------------------------------------------------|---------------------|----------------------|--------|---------------------|----------------------|--------|--------------------------------|----------------------|--------|
|        |                   |                                                                  | No                  |                      |        | Yes                 |                      |        | Item non-response <sup>a</sup> |                      |        |
|        |                   |                                                                  | Counts <sup>b</sup> | % <sup>b</sup>       | 95% CI | Counts <sup>b</sup> | % <sup>b</sup>       | 95% CI | Counts <sup>b</sup>            | % <sup>b</sup>       | 95% CI |
| Wave 3 | Suicidal thoughts | No                                                               | 2,792.3             | 77.8 ( 76.4 , 79.2 ) |        | 153.7               | 41.5 ( 36.4 , 46.7 ) |        | 145.3                          | 50.5 ( 44.5 , 56.5 ) |        |
|        |                   | Yes                                                              | 631.2               | 17.6 ( 16.4 , 18.9 ) |        | 183.4               | 49.5 ( 44.2 , 54.7 ) |        | 42.4                           | 14.7 ( 10.9 , 19.6 ) |        |
|        |                   | Item non-response <sup>a</sup>                                   | 164.3               | 4.6 ( 3.9 , 5.3 )    |        | 33.6                | 9.1 ( 6.4 , 12.7 )   |        | 99.9                           | 34.7 ( 29.2 , 40.7 ) |        |
|        | Self-harm         | No                                                               | 2,930.2             | 75.1 ( 73.7 , 76.5 ) |        | 30.5                | 34.5 ( 24.7 , 45.8 ) |        | 130.6                          | 50.7 ( 44.4 , 57.0 ) |        |
|        |                   | Yes                                                              | 774.7               | 19.9 ( 18.6 , 21.2 ) |        | 47.1                | 53.4 ( 42.3 , 64.2 ) |        | 35.1                           | 13.6 ( 9.8 , 18.6 )  |        |
|        |                   | Item non-response <sup>a</sup>                                   | 195.2               | 5.0 ( 4.4 , 5.8 )    |        | 10.7                | 12.1 ( 6.3 , 22.0 )  |        | 91.9                           | 35.7 ( 29.8 , 42.0 ) |        |
| Wave 4 | Suicidal thoughts | No                                                               | 2,897.4             | 77.9 ( 76.4 , 79.3 ) |        | 139.7               | 33.7 ( 28.9 , 38.9 ) |        | 143.4                          | 58.0 ( 51.0 , 64.7 ) |        |
|        |                   | Yes                                                              | 665.2               | 17.9 ( 16.6 , 19.2 ) |        | 226.2               | 54.6 ( 49.3 , 59.8 ) |        | 42.1                           | 17.0 ( 12.5 , 22.8 ) |        |
|        |                   | Item non-response <sup>a</sup>                                   | 158.1               | 4.2 ( 3.6 , 5.0 )    |        | 48.2                | 11.6 ( 8.6 , 15.6 )  |        | 61.6                           | 24.9 ( 19.2 , 31.7 ) |        |
|        | Self-harm         | No                                                               | 3,028.0             | 74.3 ( 72.8 , 75.7 ) |        | 17.9                | 22.8 ( 14.6 , 33.8 ) |        | 134.6                          | 59.6 ( 52.2 , 66.5 ) |        |
|        |                   | Yes                                                              | 851.7               | 20.9 ( 19.6 , 22.3 ) |        | 48.4                | 61.7 ( 49.5 , 72.6 ) |        | 33.6                           | 14.9 ( 10.2 , 21.2 ) |        |
|        |                   | Item non-response <sup>a</sup>                                   | 198.1               | 4.9 ( 4.2 , 5.6 )    |        | 12.1                | 15.4 ( 8.3 , 27.0 )  |        | 57.7                           | 25.6 ( 19.6 , 32.5 ) |        |

<sup>a</sup> Item non-response included skipped answers, 'prefer not to say', 'don't know', 'refuse to answer', and 'none of these' responses

<sup>b</sup> Weighted based, column percentages

Suppl. Table 2. Sample characteristics with unweighted based.

|                                                   |                             | Wave 1 (17-18/03/2020) |                |                 | Wave 2 (02-03/04/2020) |                |                 | Wave 3 (24-26/04/2020) |                |                 | Wave 4 (28-29/05/2020) |                |                 |
|---------------------------------------------------|-----------------------------|------------------------|----------------|-----------------|------------------------|----------------|-----------------|------------------------|----------------|-----------------|------------------------|----------------|-----------------|
|                                                   |                             | n = 2,126 <sup>a</sup> |                |                 | n = 2,221 <sup>a</sup> |                |                 | n = 4,246 <sup>a</sup> |                |                 | n = 4,382 <sup>a</sup> |                |                 |
|                                                   |                             | Counts <sup>a</sup>    | % <sup>a</sup> | 95% CI          | Counts <sup>a</sup>    | % <sup>a</sup> | 95% CI          | Counts <sup>a</sup>    | % <sup>a</sup> | 95% CI          | Counts <sup>a</sup>    | % <sup>a</sup> | 95% CI          |
| Gender                                            | Male                        | 998                    | 46.9           | ( 44.8 , 49.1 ) | 1,017                  | 45.8           | ( 43.7 , 47.9 ) | 1,990                  | 46.9           | ( 45.4 , 48.4 ) | 2,000                  | 45.6           | ( 44.2 , 47.1 ) |
|                                                   | Female                      | 1,128                  | 53.1           | ( 50.9 , 55.2 ) | 1,204                  | 54.2           | ( 52.1 , 56.3 ) | 2,256                  | 53.1           | ( 51.6 , 54.6 ) | 2,382                  | 54.4           | ( 52.9 , 55.8 ) |
| Age (years)                                       | 18-24                       | 195                    | 9.2            | ( 8.0 , 10.5 )  | 215                    | 9.7            | ( 8.5 , 11.0 )  | 423                    | 10.0           | ( 9.1 , 10.9 )  | 338                    | 7.7            | ( 7.0 , 8.5 )   |
|                                                   | 25-34                       | 347                    | 16.3           | ( 14.8 , 18.0 ) | 355                    | 16.0           | ( 14.5 , 17.6 ) | 678                    | 16.0           | ( 14.9 , 17.1 ) | 671                    | 15.3           | ( 14.3 , 16.4 ) |
|                                                   | 35-44                       | 352                    | 16.6           | ( 15.0 , 18.2 ) | 368                    | 16.6           | ( 15.1 , 18.2 ) | 706                    | 16.6           | ( 15.5 , 17.8 ) | 742                    | 16.9           | ( 15.9 , 18.1 ) |
|                                                   | 45-54                       | 376                    | 17.7           | ( 16.1 , 19.4 ) | 350                    | 15.8           | ( 14.3 , 17.3 ) | 707                    | 16.7           | ( 15.6 , 17.8 ) | 780                    | 17.8           | ( 16.7 , 19.0 ) |
|                                                   | 55+                         | 856                    | 40.3           | ( 38.2 , 42.4 ) | 933                    | 42.0           | ( 40.0 , 44.1 ) | 1,732                  | 40.8           | ( 39.3 , 42.3 ) | 1,851                  | 42.2           | ( 40.8 , 43.7 ) |
| Social grade                                      | ABC1                        | 1,275                  | 60.0           | ( 57.9 , 62.0 ) | 1,318                  | 59.3           | ( 57.3 , 61.4 ) | 2,468                  | 58.1           | ( 56.6 , 59.6 ) | 2,675                  | 61.1           | ( 59.6 , 62.5 ) |
|                                                   | C2DE                        | 851                    | 40.0           | ( 38.0 , 42.1 ) | 903                    | 40.7           | ( 38.6 , 42.7 ) | 1,778                  | 41.9           | ( 40.4 , 43.4 ) | 1,707                  | 39.0           | ( 37.5 , 40.4 ) |
| Marital status                                    | Married/ Civil Partnership  | 985                    | 46.3           | ( 44.2 , 48.5 ) | 1,036                  | 46.7           | ( 44.6 , 48.7 ) | 1,895                  | 44.6           | ( 43.1 , 46.1 ) | 2,123                  | 48.5           | ( 47.0 , 49.9 ) |
|                                                   | Living as married           | 304                    | 14.3           | ( 12.9 , 15.9 ) | 298                    | 13.4           | ( 12.1 , 14.9 ) | 576                    | 13.6           | ( 12.6 , 14.6 ) | 585                    | 13.4           | ( 12.4 , 14.4 ) |
|                                                   | Separated/ Divorced         | 186                    | 8.8            | ( 7.6 , 10.0 )  | 208                    | 9.4            | ( 8.2 , 10.6 )  | 381                    | 9.0            | ( 8.2 , 9.9 )   | 390                    | 8.9            | ( 8.1 , 9.8 )   |
|                                                   | Widowed                     | 92                     | 4.3            | ( 3.5 , 5.3 )   | 80                     | 3.6            | ( 2.9 , 4.5 )   | 156                    | 3.7            | ( 3.1 , 4.3 )   | 153                    | 3.5            | ( 3.0 , 4.1 )   |
|                                                   | Never Married               | 545                    | 25.6           | ( 23.8 , 27.5 ) | 584                    | 26.3           | ( 24.5 , 28.2 ) | 1,221                  | 28.8           | ( 27.4 , 30.1 ) | 1,101                  | 25.1           | ( 23.9 , 26.4 ) |
|                                                   | Not known                   | 14                     | 0.7            | ( 0.4 , 1.1 )   | 15                     | 0.7            | ( 0.4 , 1.1 )   | 17                     | 0.4            | ( 0.3 , 0.6 )   | 30                     | 0.7            | ( 0.5 , 1.0 )   |
| Working Status                                    | Employed <sup>b</sup>       | 1,192                  | 56.1           | ( 53.9 , 58.2 ) | 1,246                  | 56.1           | ( 54.0 , 58.2 ) | 2,219                  | 52.3           | ( 50.8 , 53.8 ) | 2,343                  | 53.5           | ( 52.0 , 54.9 ) |
|                                                   | Unemployed                  | 73                     | 3.4            | ( 2.7 , 4.3 )   | 77                     | 3.5            | ( 2.8 , 4.3 )   | 189                    | 4.5            | ( 3.9 , 5.1 )   | 159                    | 3.6            | ( 3.1 , 4.2 )   |
|                                                   | Not working/Others          | 200                    | 9.4            | ( 8.2 , 10.7 )  | 211                    | 9.5            | ( 8.3 , 10.8 )  | 485                    | 11.4           | ( 10.5 , 12.4 ) | 506                    | 11.6           | ( 10.6 , 12.5 ) |
|                                                   | Full time student           | 127                    | 6.0            | ( 5.0 , 7.1 )   | 123                    | 5.5            | ( 4.7 , 6.6 )   | 225                    | 5.3            | ( 4.7 , 6.0 )   | 159                    | 3.6            | ( 3.1 , 4.2 )   |
|                                                   | Retired                     | 534                    | 25.1           | ( 23.3 , 27.0 ) | 564                    | 25.4           | ( 23.6 , 27.2 ) | 1,128                  | 26.6           | ( 25.3 , 27.9 ) | 1,215                  | 27.7           | ( 26.4 , 29.1 ) |
| Mental health condition/<br>Psychiatric diagnosis | No                          | -                      | -              | ( - , - )       | -                      | -              | ( - , - )       | 3,093                  | 72.9           | ( 71.5 , 74.2 ) | 3,223                  | 73.6           | ( 72.2 , 74.8 ) |
|                                                   | Yes                         | -                      | -              | ( - , - )       | -                      | -              | ( - , - )       | 863                    | 20.3           | ( 19.1 , 21.6 ) | 908                    | 20.7           | ( 19.5 , 21.9 ) |
|                                                   | Prefer not to say/not known | -                      | -              | ( - , - )       | -                      | -              | ( - , - )       | 290                    | 6.8            | ( 6.1 , 7.6 )   | 251                    | 5.7            | ( 5.1 , 6.5 )   |
| Being parent/guardian                             |                             | 1,251                  | 58.8           | ( 56.7 , 60.9 ) | 1,266                  | 57.0           | ( 54.9 , 59.0 ) | 2,343                  | 55.2           | ( 53.7 , 56.7 ) | 2,531                  | 57.8           | ( 56.3 , 59.2 ) |
| Number of children                                | 0                           | 1,476                  | 69.4           | ( 67.4 , 71.3 ) | 1,604                  | 72.2           | ( 70.3 , 74.0 ) | 3,123                  | 73.6           | ( 72.2 , 74.9 ) | 3,192                  | 72.8           | ( 71.5 , 74.1 ) |
| in household                                      | 1                           | 291                    | 13.7           | ( 12.3 , 15.2 ) | 267                    | 12.0           | ( 10.7 , 13.4 ) | 468                    | 11.0           | ( 10.1 , 12.0 ) | 525                    | 12.0           | ( 11.1 , 13.0 ) |
|                                                   | 2                           | 243                    | 11.4           | ( 10.1 , 12.9 ) | 209                    | 9.4            | ( 8.3 , 10.7 )  | 422                    | 9.9            | ( 9.1 , 10.9 )  | 422                    | 9.6            | ( 8.8 , 10.5 )  |
|                                                   | 3+                          | 81                     | 3.8            | ( 3.1 , 4.7 )   | 82                     | 3.7            | ( 3.0 , 4.6 )   | 149                    | 3.5            | ( 3.0 , 4.1 )   | 170                    | 3.9            | ( 3.3 , 4.5 )   |
|                                                   | Refused to answer           | 35                     | 1.7            | ( 1.2 , 2.3 )   | 59                     | 2.7            | ( 2.1 , 3.4 )   | 84                     | 2.0            | ( 1.6 , 2.4 )   | 73                     | 1.7            | ( 1.3 , 2.1 )   |
| Living arrangements <sup>c</sup>                  | Alone                       | -                      | -              | ( - , - )       | -                      | -              | ( - , - )       | 859                    | 20.2           | ( 19.0 , 21.5 ) | 781                    | 17.8           | ( 16.7 , 19.0 ) |
|                                                   | Spouse/partner              | -                      | -              | ( - , - )       | -                      | -              | ( - , - )       | 2,418                  | 57.0           | ( 55.5 , 58.4 ) | 2,685                  | 61.3           | ( 59.8 , 62.7 ) |
|                                                   | Relative(s)                 | -                      | -              | ( - , - )       | -                      | -              | ( - , - )       | 1,415                  | 33.3           | ( 31.9 , 34.8 ) | 781                    | 17.8           | ( 33.2 , 36.1 ) |
|                                                   | Friend(s)/housemate(s)      | -                      | -              | ( - , - )       | -                      | -              | ( - , - )       | 173                    | 4.1            | ( 3.5 , 4.7 )   | 123                    | 2.8            | ( 2.4 , 3.3 )   |
| Urban/Rural area                                  | Urban                       | -                      | -              | ( - , - )       | -                      | -              | ( - , - )       | 3,181                  | 74.9           | ( 73.6 , 76.2 ) | 3,271                  | 74.7           | ( 73.3 , 75.9 ) |
|                                                   | Town/Fringe                 | -                      | -              | ( - , - )       | -                      | -              | ( - , - )       | 414                    | 9.8            | ( 8.9 , 10.7 )  | 439                    | 10.0           | ( 9.2 , 10.9 )  |
|                                                   | Rural                       | -                      | -              | ( - , - )       | -                      | -              | ( - , - )       | 523                    | 12.3           | ( 11.4 , 13.3 ) | 556                    | 12.7           | ( 11.7 , 13.7 ) |
|                                                   | Not known                   | -                      | -              | ( - , - )       | -                      | -              | ( - , - )       | 128                    | 3.0            | ( 2.5 , 3.6 )   | 116                    | 2.7            | ( 2.2 , 3.2 )   |

<sup>a</sup> Unweighted based<sup>b</sup> Includes working full-time and part-time<sup>c</sup> Row % do not add up to 100% because categories are non-mutually exclusive

Suppl. Table 3. Loneliness stratified by sample characteristics.

|                                  |                             | Wave 1 (17-18/03/2020)           |                      |        | Wave 2 (02-03/04/2020)           |                      |        | Wave 3 (24-26/04/2020)           |                      |        | Wave 4 (28-29/05/2020)           |                      |        |
|----------------------------------|-----------------------------|----------------------------------|----------------------|--------|----------------------------------|----------------------|--------|----------------------------------|----------------------|--------|----------------------------------|----------------------|--------|
|                                  |                             | n = 2,126 (2,126.0) <sup>a</sup> |                      |        | n = 2,221 (2,221.0) <sup>a</sup> |                      |        | n = 4,246 (4,246.0) <sup>a</sup> |                      |        | n = 4,382 (4,382.0) <sup>a</sup> |                      |        |
|                                  |                             | Counts <sup>a</sup>              | % <sup>a</sup>       | 95% CI | Counts <sup>a</sup>              | % <sup>a</sup>       | 95% CI | Counts <sup>a</sup>              | % <sup>a</sup>       | 95% CI | Counts <sup>a</sup>              | % <sup>a</sup>       | 95% CI |
| Total                            |                             | 208.5                            | 9.8 ( 8.6 , 11.2 )   |        | 531.0                            | 23.9 ( 22.1 , 25.8 ) |        | 1,134.9                          | 26.7 ( 25.4 , 28.1 ) |        | 1,125.4                          | 25.7 ( 24.3 , 27.1 ) |        |
| Sex                              |                             |                                  |                      |        |                                  |                      |        |                                  |                      |        |                                  |                      |        |
|                                  | Male                        | 75.6                             | 7.3 ( 5.8 , 9.3 )    |        | 216.7                            | 20.1 ( 17.6 , 22.9 ) |        | 458.4                            | 22.3 ( 20.4 , 24.2 ) |        | 439.8                            | 20.7 ( 18.7 , 22.8 ) |        |
|                                  | Female                      | 132.9                            | 12.1 ( 10.3 , 14.2 ) |        | 314.2                            | 27.5 ( 25.0 , 30.1 ) |        | 676.5                            | 30.9 ( 29.1 , 32.9 ) |        | 685.6                            | 30.4 ( 28.5 , 32.3 ) |        |
| Age (years)                      |                             |                                  |                      |        |                                  |                      |        |                                  |                      |        |                                  |                      |        |
|                                  | 18-24                       | 38.5                             | 16.3 ( 11.6 , 22.4 ) |        | 108.3                            | 43.9 ( 37.2 , 50.9 ) |        | 211.4                            | 44.9 ( 40.0 , 49.8 ) |        | 226.6                            | 46.6 ( 40.7 , 52.6 ) |        |
|                                  | 25-34                       | 50.0                             | 14.1 ( 10.8 , 18.2 ) |        | 124.5                            | 34.6 ( 29.7 , 39.7 ) |        | 243.3                            | 35.7 ( 32.1 , 39.4 ) |        | 237.3                            | 34.2 ( 30.5 , 38.0 ) |        |
|                                  | 35-44                       | 39.6                             | 11.5 ( 8.4 , 15.4 )  |        | 100.4                            | 26.5 ( 22.0 , 31.4 ) |        | 209.6                            | 29.9 ( 26.6 , 33.5 ) |        | 221.1                            | 29.9 ( 26.5 , 33.6 ) |        |
|                                  | 45-54                       | 29.0                             | 7.9 ( 5.5 , 11.1 )   |        | 55.4                             | 15.7 ( 12.2 , 19.9 ) |        | 159.0                            | 22.7 ( 19.7 , 25.9 ) |        | 144.2                            | 18.9 ( 16.3 , 21.8 ) |        |
|                                  | 55+                         | 51.4                             | 6.3 ( 4.8 , 8.1 )    |        | 142.3                            | 16.2 ( 13.9 , 18.7 ) |        | 311.5                            | 18.4 ( 16.7 , 20.3 ) |        | 296.3                            | 17.4 ( 15.8 , 19.2 ) |        |
| Social grade                     |                             |                                  |                      |        |                                  |                      |        |                                  |                      |        |                                  |                      |        |
|                                  | ABC1                        | 139.2                            | 11.5 ( 9.8 , 13.4 )  |        | 293.0                            | 23.1 ( 20.9 , 25.6 ) |        | 651.7                            | 26.9 ( 25.2 , 28.7 ) |        | 667.1                            | 26.7 ( 25.0 , 28.5 ) |        |
|                                  | C2DE                        | 69.3                             | 7.6 ( 6.0 , 9.6 )    |        | 238.0                            | 24.9 ( 22.1 , 27.9 ) |        | 483.1                            | 26.5 ( 24.4 , 28.6 ) |        | 458.3                            | 24.3 ( 22.2 , 26.6 ) |        |
| Marital status                   |                             |                                  |                      |        |                                  |                      |        |                                  |                      |        |                                  |                      |        |
|                                  | Married/ Civil Partnership  | 50.8                             | 5.3 ( 4.1 , 6.9 )    |        | 113.8                            | 11.3 ( 9.5 , 13.4 )  |        | 268.0                            | 14.4 ( 12.9 , 16.1 ) |        | 283.3                            | 14.2 ( 12.7 , 15.8 ) |        |
|                                  | Living as married           | 22.7                             | 7.5 ( 5.0 , 11.1 )   |        | 63.5                             | 21.3 ( 16.9 , 26.5 ) |        | 137.9                            | 23.9 ( 20.6 , 27.6 ) |        | 114.5                            | 18.9 ( 15.8 , 22.6 ) |        |
|                                  | Separated/ Divorced         | 16.9                             | 9.4 ( 6.0 , 14.5 )   |        | 65.8                             | 32.2 ( 26.1 , 39.0 ) |        | 146.3                            | 39.0 ( 34.2 , 44.0 ) |        | 137.9                            | 37.6 ( 32.9 , 42.5 ) |        |
|                                  | Widowed                     | 17.3                             | 20.2 ( 13.1 , 29.9 ) |        | 29.0                             | 39.2 ( 29.1 , 50.3 ) |        | 51.6                             | 35.2 ( 28.1 , 43.0 ) |        | 51.2                             | 37.3 ( 29.9 , 45.3 ) |        |
|                                  | Never Married               | 97.8                             | 16.6 ( 13.6 , 20.1 ) |        | 253.2                            | 40.8 ( 36.8 , 44.9 ) |        | 523.3                            | 41.1 ( 38.3 , 44.0 ) |        | 528.3                            | 42.5 ( 39.3 , 45.7 ) |        |
|                                  | Not known                   | 2.9                              | 22.1 ( 7.2 , 50.9 )  |        | 5.6                              | 33.0 ( 14.2 , 59.5 ) |        | 7.8                              | 40.1 ( 19.8 , 64.5 ) |        | 10.3                             | 31.1 ( 16.1 , 51.5 ) |        |
| Working Status                   |                             |                                  |                      |        |                                  |                      |        |                                  |                      |        |                                  |                      |        |
|                                  | Employed <sup>b</sup>       | 99.6                             | 8.4 ( 6.9 , 10.1 )   |        | 298.2                            | 23.6 ( 21.3 , 26.1 ) |        | 599.5                            | 26.7 ( 24.9 , 28.6 ) |        | 620.0                            | 26.1 ( 24.2 , 28.0 ) |        |
|                                  | Unemployed                  | 13.5                             | 16.9 ( 9.2 , 29.1 )  |        | 28.5                             | 32.9 ( 23.0 , 44.6 ) |        | 94.3                             | 47.6 ( 40.4 , 54.9 ) |        | 46.4                             | 25.5 ( 19.1 , 33.1 ) |        |
|                                  | Not working/Others          | 29.2                             | 14.0 ( 9.8 , 19.6 )  |        | 63.2                             | 29.4 ( 23.6 , 36.1 ) |        | 146.4                            | 29.8 ( 25.8 , 34.0 ) |        | 160.1                            | 30.7 ( 26.6 , 35.1 ) |        |
|                                  | Full time student           | 30.5                             | 20.6 ( 14.4 , 28.6 ) |        | 60.8                             | 44.9 ( 36.0 , 54.0 ) |        | 112.6                            | 45.8 ( 39.2 , 52.6 ) |        | 105.8                            | 48.5 ( 39.9 , 57.2 ) |        |
|                                  | Retired                     | 35.7                             | 7.1 ( 5.2 , 9.7 )    |        | 80.2                             | 15.5 ( 12.7 , 18.7 ) |        | 182.2                            | 17.1 ( 15.0 , 19.5 ) |        | 193.2                            | 17.8 ( 15.8 , 20.1 ) |        |
| Mental health condition/         |                             |                                  |                      |        |                                  |                      |        |                                  |                      |        |                                  |                      |        |
|                                  | No                          | -                                | - ( -, - )           |        | -                                | - ( -, - )           |        | 667.5                            | 21.6 ( 20.2 , 23.1 ) |        | 661.6                            | 20.8 ( 19.3 , 22.3 ) |        |
| Psychiatric diagnosis            |                             |                                  |                      |        |                                  |                      |        |                                  |                      |        |                                  |                      |        |
|                                  | Yes                         | -                                | - ( -, - )           |        | -                                | - ( -, - )           |        | 376.7                            | 44.0 ( 40.6 , 47.3 ) |        | 380.1                            | 40.7 ( 37.3 , 44.2 ) |        |
|                                  | Prefer not to say/not known | -                                | - ( -, - )           |        | -                                | - ( -, - )           |        | 90.6                             | 30.4 ( 25.4 , 36.0 ) |        | 83.7                             | 31.2 ( 25.3 , 37.9 ) |        |
| Being parent/guardian            |                             |                                  |                      |        |                                  |                      |        |                                  |                      |        |                                  |                      |        |
|                                  |                             | 77.5                             | 6.3 ( 5.1 , 7.8 )    |        | 218.9                            | 17.6 ( 15.6 , 19.9 ) |        | 518.2                            | 22.5 ( 20.8 , 24.2 ) |        | 466.6                            | 19.4 ( 17.9 , 21.1 ) |        |
| Number of children               |                             |                                  |                      |        |                                  |                      |        |                                  |                      |        |                                  |                      |        |
|                                  | 0                           | 149.9                            | 10.3 ( 8.8 , 12.0 )  |        | 374.3                            | 23.7 ( 21.6 , 25.9 ) |        | 831.3                            | 26.7 ( 25.2 , 28.3 ) |        | 815.3                            | 25.9 ( 24.3 , 27.5 ) |        |
| in household                     |                             |                                  |                      |        |                                  |                      |        |                                  |                      |        |                                  |                      |        |
|                                  | 1                           | 21.7                             | 7.3 ( 4.8 , 10.9 )   |        | 79.3                             | 28.5 ( 23.3 , 34.4 ) |        | 133.3                            | 28.2 ( 24.2 , 32.5 ) |        | 157.8                            | 28.7 ( 24.7 , 33.1 ) |        |
|                                  | 2                           | 26.1                             | 10.5 ( 7.1 , 15.3 )  |        | 30.0                             | 14.0 ( 10.0 , 19.4 ) |        | 112.6                            | 26.7 ( 22.6 , 31.2 ) |        | 92.1                             | 22.2 ( 18.0 , 26.9 ) |        |
|                                  | 3+                          | 6.6                              | 7.6 ( 3.4 , 16.2 )   |        | 29.7                             | 33.6 ( 23.8 , 45.2 ) |        | 44.6                             | 29.4 ( 22.4 , 37.6 ) |        | 43.4                             | 23.9 ( 17.5 , 31.6 ) |        |
|                                  | Refused to answer           | 4.1                              | 12.2 ( 4.6 , 28.5 )  |        | 17.7                             | 28.5 ( 18.6 , 41.1 ) |        | 13.1                             | 14.7 ( 8.5 , 24.4 )  |        | 16.9                             | 20.6 ( 12.8 , 31.3 ) |        |
| Living arrangements <sup>c</sup> |                             |                                  |                      |        |                                  |                      |        |                                  |                      |        |                                  |                      |        |
|                                  | Alone                       | -                                | - ( -, - )           |        | -                                | - ( -, - )           |        | 358.3                            | 42.1 ( 38.8 , 45.5 ) |        | 353.4                            | 46.6 ( 43.0 , 50.3 ) |        |
|                                  | Spouse/partner              | -                                | - ( -, - )           |        | -                                | - ( -, - )           |        | 400.7                            | 16.8 ( 15.4 , 18.4 ) |        | 401.9                            | 15.6 ( 14.2 , 17.1 ) |        |
|                                  | Relative(s)                 | -                                | - ( -, - )           |        | -                                | - ( -, - )           |        | 415.1                            | 28.7 ( 26.4 , 31.2 ) |        | 458.7                            | 28.5 ( 26.0 , 31.1 ) |        |
|                                  | Friend(s)/housemate(s)      | -                                | - ( -, - )           |        | -                                | - ( -, - )           |        | 97.1                             | 52.5 ( 44.8 , 60.0 ) |        | 51.4                             | 39.8 ( 31.1 , 49.2 ) |        |
| Urban/Rural area                 |                             |                                  |                      |        |                                  |                      |        |                                  |                      |        |                                  |                      |        |
|                                  | Urban                       | -                                | - ( -, - )           |        | -                                | - ( -, - )           |        | 885.5                            | 27.5 ( 26.0 , 29.1 ) |        | 884.6                            | 26.7 ( 25.1 , 28.4 ) |        |
|                                  | Town/Fringe                 | -                                | - ( -, - )           |        | -                                | - ( -, - )           |        | 102.1                            | 25.4 ( 21.4 , 29.9 ) |        | 102.0                            | 24.1 ( 19.9 , 28.8 ) |        |
|                                  | Rural                       | -                                | - ( -, - )           |        | -                                | - ( -, - )           |        | 114.3                            | 22.2 ( 18.8 , 26.1 ) |        | 117.8                            | 22.2 ( 18.7 , 26.0 ) |        |
|                                  | Not known                   | -                                | - ( -, - )           |        | -                                | - ( -, - )           |        | 33.0                             | 29.3 ( 22.1 , 37.8 ) |        | 21.1                             | 18.1 ( 11.7 , 27.0 ) |        |

<sup>a</sup> Weighted based<sup>b</sup> Includes working full-time and part-time<sup>c</sup> Row counts do not add up to total because categories are non-mutually exclusive.

Suppl. Table 4. Coping with stress stratified by sample characteristics for wave 2.

|                       |                            | Wave 2 (02-03/04/2020) n = 2,164 (2,159.0) <sup>a</sup> |                |               |                     |                |               |                            |                |               |
|-----------------------|----------------------------|---------------------------------------------------------|----------------|---------------|---------------------|----------------|---------------|----------------------------|----------------|---------------|
|                       |                            | Not well <sup>b</sup>                                   |                |               | Well <sup>c</sup>   |                |               | Not applicable (no stress) |                |               |
|                       |                            | Counts <sup>a</sup>                                     | % <sup>a</sup> | 95% CI        | Counts <sup>a</sup> | % <sup>a</sup> | 95% CI        | Counts <sup>a</sup>        | % <sup>a</sup> | 95% CI        |
| Total                 |                            | 290.6                                                   | 13.5 (         | 12.1 , 15.0 ) | 1,612.8             | 74.7 (         | 72.8 , 76.5 ) | 255.7                      | 11.8 (         | 10.5 , 13.3 ) |
| Sex                   | Male                       | 104.2                                                   | 10.0 (         | 8.2 , 12.2 )  | 782.9               | 75.3 (         | 72.4 , 78.0 ) | 152.8                      | 14.7 (         | 12.6 , 17.1 ) |
|                       | Female                     | 186.3                                                   | 16.7 (         | 14.6 , 18.9 ) | 829.9               | 74.2 (         | 71.6 , 76.6 ) | 102.9                      | 9.2 (          | 7.7 , 11.0 )  |
| Age (years)           | 18-24                      | 52.3                                                    | 22.3 (         | 17.1 , 28.6 ) | 158.1               | 67.4 (         | 60.4 , 73.8 ) | 24.0                       | 10.2 (         | 6.4 , 15.9 )  |
|                       | 25-34                      | 73.1                                                    | 21.2 (         | 17.1 , 26.0 ) | 239.7               | 69.6 (         | 64.3 , 74.4 ) | 31.7                       | 9.2 (          | 6.4 , 13.0 )  |
|                       | 35-44                      | 62.8                                                    | 17.3 (         | 13.7 , 21.6 ) | 268.8               | 74.0 (         | 69.1 , 78.3 ) | 31.7                       | 8.7 (          | 6.2 , 12.2 )  |
|                       | 45-54                      | 35.1                                                    | 10.1 (         | 7.3 , 13.8 )  | 279.0               | 80.5 (         | 75.9 , 84.4 ) | 32.5                       | 9.4 (          | 6.7 , 13.0 )  |
|                       | 55+                        | 67.2                                                    | 7.7 (          | 6.2 , 9.6 )   | 667.2               | 76.7 (         | 73.8 , 79.3 ) | 135.8                      | 15.6 (         | 13.4 , 18.1 ) |
| Social grade          | ABC1                       | 164.8                                                   | 13.2 (         | 11.4 , 15.2 ) | 941.0               | 75.6 (         | 73.1 , 77.9 ) | 139.5                      | 11.2 (         | 9.6 , 13.1 )  |
|                       | C2DE                       | 125.8                                                   | 13.8 (         | 11.6 , 16.2 ) | 671.8               | 73.5 (         | 70.4 , 76.4 ) | 116.2                      | 12.7 (         | 10.6 , 15.2 ) |
| Marital status        | Married/ Civil Partnership | 90.3                                                    | 9.1 (          | 7.5 , 11.1 )  | 777.6               | 78.7 (         | 76.0 , 81.1 ) | 120.5                      | 12.2 (         | 10.3 , 14.3 ) |
|                       | Living as married          | 35.1                                                    | 12.1 (         | 8.8 , 16.4 )  | 226.4               | 78.1 (         | 73.0 , 82.6 ) | 28.3                       | 9.8 (          | 6.8 , 13.8 )  |
|                       | Separated/ Divorced        | 27.1                                                    | 13.7 (         | 9.5 , 19.3 )  | 150.1               | 75.8 (         | 69.3 , 81.2 ) | 20.9                       | 10.5 (         | 7.0 , 15.6 )  |
|                       | Widowed                    | 10.4                                                    | 14.0 (         | 7.9 , 23.6 )  | 50.7                | 68.4 (         | 57.4 , 77.7 ) | 13.0                       | 17.5 (         | 10.6 , 27.5 ) |
|                       | Never Married              | 126.6                                                   | 21.4 (         | 18.1 , 25.0 ) | 393.2               | 66.3 (         | 62.2 , 70.2 ) | 73.0                       | 12.3 (         | 9.7 , 15.5 )  |
|                       | Not known                  | 1.0                                                     | 6.5 (          | 0.9 , 34.9 )  | 14.8                | 93.5 (         | 65.1 , 99.1 ) | 0.0                        | 0.0 (          | 0.0 , 0.0 )   |
| Working Status        | Employed <sup>d</sup>      | 158.7                                                   | 12.9 (         | 11.1 , 14.9 ) | 951.6               | 77.5 (         | 75.0 , 79.8 ) | 117.4                      | 9.6 (          | 8.0 , 11.4 )  |
|                       | Unemployed                 | 21.7                                                    | 26.2 (         | 17.1 , 37.9 ) | 47.2                | 56.9 (         | 45.0 , 68.1 ) | 14.0                       | 16.9 (         | 9.5 , 28.3 )  |
|                       | Not working/Others         | 41.6                                                    | 20.7 (         | 15.6 , 26.8 ) | 138.5               | 68.8 (         | 62.0 , 74.8 ) | 21.3                       | 10.6 (         | 7.0 , 15.6 )  |
|                       | Full time student          | 33.1                                                    | 24.8 (         | 17.8 , 33.5 ) | 82.7                | 61.9 (         | 52.6 , 70.5 ) | 17.7                       | 13.3 (         | 7.9 , 21.5 )  |
|                       | Retired                    | 35.5                                                    | 6.9 (          | 5.1 , 9.3 )   | 392.8               | 76.5 (         | 72.8 , 79.8 ) | 85.2                       | 16.6 (         | 13.7 , 19.9 ) |
| Being parent/guardian |                            | 133.6                                                   | 11.0 (         | 9.4 , 12.9 )  | 939.9               | 77.4 (         | 75.0 , 79.6 ) | 141.0                      | 11.6 (         | 10.0 , 13.5 ) |
| Number of children    | 0                          | 186.4                                                   | 12.1 (         | 10.5 , 13.8 ) | 1,152.8             | 74.6 (         | 72.3 , 76.7 ) | 206.7                      | 13.4 (         | 11.7 , 15.2 ) |
| in household          | 1                          | 49.4                                                    | 18.5 (         | 14.2 , 23.7 ) | 194.7               | 73.0 (         | 67.1 , 78.1 ) | 22.8                       | 8.5 (          | 5.6 , 12.8 )  |
|                       | 2                          | 25.1                                                    | 12.1 (         | 8.2 , 17.5 )  | 167.3               | 80.7 (         | 74.6 , 85.6 ) | 14.9                       | 7.2 (          | 4.4 , 11.6 )  |
|                       | 3+                         | 13.2                                                    | 15.2 (         | 8.9 , 24.7 )  | 70.7                | 80.9 (         | 70.8 , 88.1 ) | 3.4                        | 3.9 (          | 1.2 , 11.7 )  |
|                       | Refused to answer          | 16.5                                                    | 31.9 (         | 20.0 , 46.8 ) | 27.2                | 52.9 (         | 38.7 , 66.6 ) | 7.8                        | 15.2 (         | 7.3 , 29.0 )  |

<sup>a</sup> Weighted based  
<sup>b</sup> Unwell included 'not very well' and 'not at all well'  
<sup>c</sup> Well included 'very well' and 'fairly well'  
<sup>d</sup> Includes working full-time and part-time

Suppl. Table 5. Coping with stress stratified by sample characteristics for wave 3.

|                                                   |                             | Wave 3 (24-26/04/2020) n = 4,135 (4,131.9) <sup>a</sup> |                |               |                     |                |               |                            |                |               |
|---------------------------------------------------|-----------------------------|---------------------------------------------------------|----------------|---------------|---------------------|----------------|---------------|----------------------------|----------------|---------------|
|                                                   |                             | Not well <sup>b</sup>                                   |                |               | Well <sup>c</sup>   |                |               | Not applicable (no stress) |                |               |
|                                                   |                             | Counts <sup>a</sup>                                     | % <sup>a</sup> | 95% CI        | Counts <sup>a</sup> | % <sup>a</sup> | 95% CI        | Counts <sup>a</sup>        | % <sup>a</sup> | 95% CI        |
| Total                                             |                             | 533.1                                                   | 12.9 (         | 11.9 , 14.0 ) | 2,984.4             | 72.2 (         | 70.8 , 73.6 ) | 614.5                      | 14.9 (         | 13.8 , 16.0 ) |
| Sex                                               |                             | 228.6                                                   | 11.4 (         | 10.0 , 13.0 ) | 1,402.3             | 70.0 (         | 67.9 , 72.1 ) | 371.6                      | 18.6 (         | 16.9 , 20.4 ) |
|                                                   | Male                        | 304.4                                                   | 14.3 (         | 12.9 , 15.8 ) | 1,582.1             | 74.3 (         | 72.4 , 76.1 ) | 242.9                      | 11.4 (         | 10.1 , 12.8 ) |
|                                                   | Female                      | 124.7                                                   | 19.1 (         | 16.2 , 22.4 ) | 466.0               | 71.3 (         | 67.6 , 74.8 ) | 62.6                       | 9.6 (          | 7.4 , 12.2 )  |
| Age (years)                                       |                             | 103.9                                                   | 15.4 (         | 12.7 , 18.5 ) | 495.5               | 73.3 (         | 69.7 , 76.6 ) | 76.8                       | 11.4 (         | 9.1 , 14.0 )  |
|                                                   | 18-24                       | 77.6                                                    | 11.3 (         | 9.1 , 13.9 )  | 528.7               | 77.1 (         | 73.8 , 80.1 ) | 79.3                       | 11.6 (         | 9.4 , 14.2 )  |
|                                                   | 25-34                       | 131.0                                                   | 7.8 (          | 6.6 , 9.2 )   | 1,206.2             | 72.1 (         | 69.9 , 74.2 ) | 336.1                      | 20.1 (         | 18.3 , 22.0 ) |
|                                                   | 35-44                       | 258.8                                                   | 11.0 (         | 9.7 , 12.3 )  | 1,772.9             | 75.1 (         | 73.3 , 76.8 ) | 330.4                      | 14.0 (         | 12.6 , 15.5 ) |
|                                                   | 45-54                       | 274.3                                                   | 15.5 (         | 13.8 , 17.4 ) | 1,211.4             | 68.4 (         | 66.2 , 70.7 ) | 284.1                      | 16.1 (         | 14.4 , 17.9 ) |
|                                                   | 55+                         | 168.8                                                   | 9.3 (          | 8.0 , 10.7 )  | 1,365.9             | 75.0 (         | 73.0 , 76.9 ) | 286.4                      | 15.7 (         | 14.1 , 17.5 ) |
| Social grade                                      |                             | 88.6                                                    | 15.8 (         | 12.9 , 19.2 ) | 404.3               | 72.1 (         | 68.1 , 75.7 ) | 68.2                       | 12.2 (         | 9.6 , 15.2 )  |
|                                                   | ABC1                        | 49.5                                                    | 13.5 (         | 10.4 , 17.5 ) | 264.5               | 72.3 (         | 67.5 , 76.6 ) | 51.9                       | 14.2 (         | 11.0 , 18.1 ) |
|                                                   | C2DE                        | 14.0                                                    | 9.7 (          | 5.8 , 15.7 )  | 93.9                | 64.8 (         | 56.9 , 72.0 ) | 37.0                       | 25.5 (         | 19.3 , 33.0 ) |
| Marital status                                    |                             | 207.3                                                   | 17.0 (         | 14.9 , 19.3 ) | 848.4               | 69.5 (         | 66.7 , 72.1 ) | 165.3                      | 13.5 (         | 11.6 , 15.7 ) |
|                                                   | Married/ Civil Partnership  | 4.9                                                     | 27.5 (         | 10.4 , 55.2 ) | 7.3                 | 40.8 (         | 20.0 , 65.5 ) | 5.7                        | 31.7 (         | 13.6 , 57.8 ) |
|                                                   | Living as married           | 275.2                                                   | 12.6 (         | 11.2 , 14.1 ) | 1,673.1             | 76.5 (         | 74.6 , 78.3 ) | 239.4                      | 10.9 (         | 9.7 , 12.4 )  |
|                                                   | Separated/ Divorced         | 51.2                                                    | 26.7 (         | 20.5 , 33.8 ) | 115.3               | 60.0 (         | 52.6 , 67.1 ) | 25.6                       | 13.3 (         | 9.1 , 19.1 )  |
|                                                   | Widowed                     | 92.6                                                    | 19.9 (         | 16.4 , 23.8 ) | 297.9               | 63.9 (         | 59.3 , 68.2 ) | 75.7                       | 16.2 (         | 13.1 , 20.0 ) |
|                                                   | Never Married               | 51.2                                                    | 22.1 (         | 17.0 , 28.3 ) | 152.7               | 65.9 (         | 59.0 , 72.2 ) | 27.8                       | 12.0 (         | 8.0 , 17.7 )  |
| Working Status                                    |                             | 62.8                                                    | 6.0 (          | 4.7 , 7.5 )   | 745.4               | 70.7 (         | 68.0 , 73.3 ) | 246.0                      | 23.3 (         | 20.9 , 25.9 ) |
|                                                   | Employed <sup>d</sup>       | 237.7                                                   | 7.8 (          | 6.9 , 8.9 )   | 2,301.6             | 75.7 (         | 74.1 , 77.2 ) | 501.3                      | 16.5 (         | 15.2 , 17.9 ) |
|                                                   | Unemployed                  | 228.9                                                   | 27.3 (         | 24.4 , 30.5 ) | 544.7               | 65.0 (         | 61.6 , 68.2 ) | 64.6                       | 7.7 (          | 6.0 , 9.8 )   |
|                                                   | Not working/Others          | 66.4                                                    | 26.3 (         | 21.0 , 32.3 ) | 138.1               | 54.6 (         | 48.2 , 60.8 ) | 48.5                       | 19.2 (         | 14.6 , 24.8 ) |
|                                                   | Full time student           | 257.8                                                   | 11.4 (         | 10.1 , 12.8 ) | 1,662.4             | 73.4 (         | 71.5 , 75.2 ) | 345.8                      | 15.3 (         | 13.8 , 16.8 ) |
|                                                   | Retired                     | 368.6                                                   | 12.1 (         | 10.9 , 13.3 ) | 2,199.7             | 72.1 (         | 70.5 , 73.7 ) | 482.5                      | 15.8 (         | 14.6 , 17.2 ) |
| Mental health condition/<br>Psychiatric diagnosis |                             | 70.4                                                    | 15.4 (         | 12.3 , 19.2 ) | 330.2               | 72.5 (         | 68.0 , 76.5 ) | 55.1                       | 12.1 (         | 9.3 , 15.6 )  |
|                                                   | No                          | 62.7                                                    | 15.3 (         | 12.0 , 19.2 ) | 308.9               | 75.1 (         | 70.6 , 79.2 ) | 39.4                       | 9.6 (          | 7.0 , 13.0 )  |
|                                                   | Yes                         | 26.6                                                    | 17.9 (         | 12.2 , 25.6 ) | 107.5               | 72.6 (         | 64.3 , 79.6 ) | 14.1                       | 9.5 (          | 5.5 , 15.9 )  |
|                                                   | Prefer not to say/not known | 4.8                                                     | 7.3 (          | 2.7 , 18.3 )  | 38.0                | 57.4 (         | 44.7 , 69.2 ) | 23.4                       | 35.3 (         | 24.4 , 48.1 ) |
| Being parent/guardian                             |                             | 109.9                                                   | 13.3 (         | 11.0 , 15.9 ) | 577.7               | 69.8 (         | 66.5 , 72.9 ) | 140.3                      | 16.9 (         | 14.5 , 19.7 ) |
| Number of children                                |                             | 250.5                                                   | 10.7 (         | 9.5 , 12.1 )  | 1,741.0             | 74.4 (         | 72.6 , 76.2 ) | 347.4                      | 14.9 (         | 13.5 , 16.4 ) |
| in household                                      |                             | 210.1                                                   | 15.0 (         | 13.2 , 17.0 ) | 1,027.8             | 73.4 (         | 70.9 , 75.7 ) | 162.7                      | 11.6 (         | 10.0 , 13.5 ) |
|                                                   | 0                           | 46.8                                                    | 25.9 (         | 19.6 , 33.4 ) | 117.1               | 64.8 (         | 57.0 , 72.0 ) | 16.7                       | 9.2 (          | 5.4 , 15.3 )  |
|                                                   | 1                           | 422.0                                                   | 13.5 (         | 12.3 , 14.8 ) | 2,267.7             | 72.7 (         | 71.0 , 74.2 ) | 431.2                      | 13.8 (         | 12.6 , 15.1 ) |
|                                                   | 2                           | 43.0                                                    | 11.0 (         | 8.2 , 14.5 )  | 274.7               | 70.0 (         | 65.3 , 74.3 ) | 74.9                       | 19.1 (         | 15.5 , 23.2 ) |
|                                                   | 3+                          | 53.9                                                    | 10.7 (         | 8.2 , 13.7 )  | 356.4               | 70.4 (         | 66.3 , 74.3 ) | 95.6                       | 18.9 (         | 15.7 , 22.5 ) |
|                                                   | Refused to answer           | 14.0                                                    | 12.5 (         | 7.7 , 19.5 )  | 85.7                | 76.1 (         | 68.0 , 82.8 ) | 12.8                       | 11.4 (         | 7.0 , 18.1 )  |
| Living arrangements <sup>e</sup>                  |                             |                                                         |                |               |                     |                |               |                            |                |               |
|                                                   | Alone                       |                                                         |                |               |                     |                |               |                            |                |               |
|                                                   | Spouse/partner              |                                                         |                |               |                     |                |               |                            |                |               |
|                                                   | Relative(s)                 |                                                         |                |               |                     |                |               |                            |                |               |
|                                                   | Friend(s)/housemate(s)      |                                                         |                |               |                     |                |               |                            |                |               |
| Urban/Rural area                                  |                             |                                                         |                |               |                     |                |               |                            |                |               |
|                                                   | Urban                       |                                                         |                |               |                     |                |               |                            |                |               |
|                                                   | Town/Fringe                 |                                                         |                |               |                     |                |               |                            |                |               |
|                                                   | Rural                       |                                                         |                |               |                     |                |               |                            |                |               |
|                                                   | Not known                   |                                                         |                |               |                     |                |               |                            |                |               |

<sup>a</sup> Weighted based<sup>b</sup> Unwell included 'not very well' and 'not at all well'<sup>c</sup> Well included 'very well' and 'fairly well'<sup>d</sup> Includes working full-time and part-time<sup>e</sup> Row counts do not add up to total because categories are non-mutually exclusive.

Suppl. Table 6. Coping with stress stratified by sample characteristics for wave 4.

|                                                   |                             | Wave 4 (28-29/05/2020) n = 4,290 (4,280.1) <sup>a</sup> |                |               |                     |                |               |                            |                |               |
|---------------------------------------------------|-----------------------------|---------------------------------------------------------|----------------|---------------|---------------------|----------------|---------------|----------------------------|----------------|---------------|
|                                                   |                             | Not well <sup>b</sup>                                   |                |               | Well <sup>c</sup>   |                |               | Not applicable (no stress) |                |               |
|                                                   |                             | Counts <sup>a</sup>                                     | % <sup>a</sup> | 95% CI        | Counts <sup>a</sup> | % <sup>a</sup> | 95% CI        | Counts <sup>a</sup>        | % <sup>a</sup> | 95% CI        |
| Total                                             |                             | 609.7                                                   | 14.2 (         | 13.2 , 15.4 ) | 2,977.8             | 69.6 (         | 68.1 , 71.0 ) | 692.6                      | 16.2 (         | 15.1 , 17.4 ) |
| Sex                                               |                             | 248.2                                                   | 12.0 (         | 10.4 , 13.8 ) | 1,395.6             | 67.4 (         | 65.1 , 69.7 ) | 425.4                      | 20.6 (         | 18.7 , 22.5 ) |
|                                                   | Male                        | 361.5                                                   | 16.4 (         | 14.9 , 17.9 ) | 1,582.2             | 71.6 (         | 69.7 , 73.4 ) | 267.2                      | 12.1 (         | 10.8 , 13.5 ) |
|                                                   | Female                      | 109.4                                                   | 23.5 (         | 18.9 , 28.9 ) | 306.0               | 65.7 (         | 59.8 , 71.2 ) | 50.2                       | 10.8 (         | 7.4 , 15.4 )  |
| Age (years)                                       |                             | 140.6                                                   | 20.7 (         | 17.5 , 24.2 ) | 475.9               | 70.0 (         | 66.0 , 73.7 ) | 63.2                       | 9.3 (          | 7.0 , 12.2 )  |
|                                                   | 18-24                       | 117.9                                                   | 16.7 (         | 14.0 , 19.9 ) | 513.0               | 72.7 (         | 69.0 , 76.1 ) | 74.8                       | 10.6 (         | 8.4 , 13.3 )  |
|                                                   | 25-34                       | 99.2                                                    | 13.3 (         | 11.1 , 15.9 ) | 545.0               | 73.2 (         | 69.8 , 76.2 ) | 100.8                      | 13.5 (         | 11.2 , 16.2 ) |
|                                                   | 35-44                       | 142.6                                                   | 8.5 (          | 7.3 , 9.8 )   | 1,137.9             | 67.6 (         | 65.4 , 69.7 ) | 403.7                      | 24.0 (         | 22.1 , 26.0 ) |
|                                                   | 45-54                       | 327.9                                                   | 13.4 (         | 12.0 , 14.8 ) | 1,756.1             | 71.7 (         | 69.8 , 73.4 ) | 366.4                      | 15.0 (         | 13.6 , 16.4 ) |
|                                                   | 55+                         | 281.8                                                   | 15.4 (         | 13.6 , 17.4 ) | 1,221.7             | 66.8 (         | 64.3 , 69.1 ) | 326.2                      | 17.8 (         | 15.9 , 19.9 ) |
| Social grade                                      |                             | 202.3                                                   | 10.3 (         | 9.0 , 11.7 )  | 1,403.1             | 71.5 (         | 69.5 , 73.4 ) | 357.1                      | 18.2 (         | 16.6 , 19.9 ) |
|                                                   | ABC1                        | 95.6                                                    | 16.1 (         | 13.1 , 19.8 ) | 413.0               | 69.7 (         | 65.5 , 73.7 ) | 83.7                       | 14.1 (         | 11.3 , 17.5 ) |
|                                                   | C2DE                        | 56.4                                                    | 15.7 (         | 12.4 , 19.8 ) | 255.0               | 71.2 (         | 66.4 , 75.5 ) | 46.9                       | 13.1 (         | 10.1 , 16.8 ) |
| Marital status                                    |                             | 12.6                                                    | 9.3 (          | 5.6 , 15.2 )  | 82.5                | 61.4 (         | 53.2 , 69.0 ) | 39.4                       | 29.3 (         | 22.4 , 37.3 ) |
|                                                   | Married/ Civil Partnership  | 238.1                                                   | 19.8 (         | 17.3 , 22.6 ) | 802.6               | 66.8 (         | 63.6 , 69.9 ) | 160.4                      | 13.4 (         | 11.2 , 15.8 ) |
|                                                   | Living as married           | 4.7                                                     | 14.9 (         | 6.1 , 32.2 )  | 21.4                | 68.4 (         | 47.3 , 84.0 ) | 5.2                        | 16.6 (         | 5.6 , 40.3 )  |
|                                                   | Separated/ Divorced         | 322.0                                                   | 13.8 (         | 12.3 , 15.4 ) | 1,708.8             | 73.1 (         | 71.1 , 75.0 ) | 308.2                      | 13.2 (         | 11.8 , 14.7 ) |
|                                                   | Widowed                     | 47.4                                                    | 28.0 (         | 20.7 , 36.6 ) | 97.5                | 57.5 (         | 48.7 , 65.9 ) | 24.6                       | 14.5 (         | 9.3 , 21.8 )  |
|                                                   | Never Married               | 118.3                                                   | 23.7 (         | 20.0 , 27.9 ) | 327.6               | 65.7 (         | 61.1 , 70.0 ) | 52.7                       | 10.6 (         | 8.0 , 13.9 )  |
| Working Status                                    |                             | 45.7                                                    | 22.5 (         | 16.5 , 30.0 ) | 134.5               | 66.4 (         | 57.7 , 74.0 ) | 22.5                       | 11.1 (         | 6.4 , 18.6 )  |
|                                                   | Not known                   | 76.3                                                    | 7.1 (          | 5.8 , 8.7 )   | 709.3               | 66.3 (         | 63.5 , 68.9 ) | 284.7                      | 26.6 (         | 24.2 , 29.2 ) |
|                                                   | Employed <sup>d</sup>       | 268.4                                                   | 8.6 (          | 7.6 , 9.7 )   | 2,264.8             | 72.3 (         | 70.7 , 73.9 ) | 598.0                      | 19.1 (         | 17.7 , 20.6 ) |
|                                                   | Unemployed                  | 293.8                                                   | 32.1 (         | 28.9 , 35.5 ) | 568.8               | 62.1 (         | 58.6 , 65.5 ) | 52.8                       | 5.8 (          | 4.3 , 7.7 )   |
|                                                   | Not working/Others          | 47.5                                                    | 20.3 (         | 15.4 , 26.5 ) | 144.2               | 61.8 (         | 54.7 , 68.4 ) | 41.8                       | 17.9 (         | 12.9 , 24.3 ) |
|                                                   | Full time student           | 279.2                                                   | 11.9 (         | 10.6 , 13.3 ) | 1,661.6             | 70.6 (         | 68.8 , 72.4 ) | 411.3                      | 17.5 (         | 16.0 , 19.0 ) |
|                                                   | Retired                     | 417.9                                                   | 13.5 (         | 12.3 , 14.8 ) | 2,129.7             | 68.7 (         | 66.9 , 70.3 ) | 553.9                      | 17.9 (         | 16.5 , 19.3 ) |
| Mental health condition/<br>Psychiatric diagnosis |                             | 96.5                                                    | 18.1 (         | 14.6 , 22.2 ) | 389.7               | 73.0 (         | 68.6 , 77.1 ) | 47.5                       | 8.9 (          | 6.6 , 11.9 )  |
|                                                   | No                          | 54.1                                                    | 13.4 (         | 10.1 , 17.6 ) | 305.1               | 75.7 (         | 71.0 , 79.8 ) | 44.0                       | 10.9 (         | 8.2 , 14.3 )  |
|                                                   | Yes                         | 28.0                                                    | 16.2 (         | 11.1 , 23.0 ) | 122.9               | 70.9 (         | 63.2 , 77.6 ) | 22.4                       | 12.9 (         | 8.7 , 18.9 )  |
|                                                   | Prefer not to say/not known | 13.2                                                    | 19.3 (         | 11.4 , 30.8 ) | 30.4                | 44.4 (         | 31.6 , 58.1 ) | 24.8                       | 36.3 (         | 23.6 , 51.2 ) |
| Being parent/guardian                             |                             | 123.4                                                   | 16.6 (         | 14.0 , 19.6 ) | 495.4               | 66.7 (         | 63.2 , 70.1 ) | 123.8                      | 16.7 (         | 14.2 , 19.5 ) |
| Number of children<br>in household                |                             | 290.0                                                   | 11.4 (         | 10.2 , 12.8 ) | 1,820.3             | 71.6 (         | 69.8 , 73.4 ) | 431.7                      | 17.0 (         | 15.6 , 18.5 ) |
|                                                   | 0                           | 247.2                                                   | 15.8 (         | 13.9 , 18.0 ) | 1,115.4             | 71.4 (         | 68.8 , 73.8 ) | 199.8                      | 12.8 (         | 11.0 , 14.8 ) |
|                                                   | 1                           | 21.4                                                    | 17.3 (         | 11.2 , 25.6 ) | 92.1                | 74.1 (         | 65.2 , 81.4 ) | 10.7                       | 8.6 (          | 4.8 , 15.1 )  |
|                                                   | 2                           | 475.8                                                   | 14.7 (         | 13.5 , 16.1 ) | 2,241.2             | 69.5 (         | 67.7 , 71.1 ) | 509.1                      | 15.8 (         | 14.5 , 17.2 ) |
|                                                   | 3+                          | 57.2                                                    | 13.8 (         | 10.7 , 17.5 ) | 297.1               | 71.5 (         | 66.9 , 75.8 ) | 60.9                       | 14.7 (         | 11.5 , 18.5 ) |
|                                                   | Refused to answer           | 62.1                                                    | 11.9 (         | 9.2 , 15.2 )  | 360.6               | 68.9 (         | 64.7 , 72.8 ) | 100.5                      | 19.2 (         | 16.1 , 22.8 ) |
| Living arrangements <sup>e</sup>                  |                             | 14.5                                                    | 12.6 (         | 7.3 , 20.9 )  | 78.9                | 68.3 (         | 58.9 , 76.4 ) | 22.1                       | 19.1 (         | 13.0 , 27.2 ) |
|                                                   | Alone                       |                                                         |                |               |                     |                |               |                            |                |               |
|                                                   | Spouse/partner              |                                                         |                |               |                     |                |               |                            |                |               |
|                                                   | Relative(s)                 |                                                         |                |               |                     |                |               |                            |                |               |
|                                                   | Friend(s)/housemate(s)      |                                                         |                |               |                     |                |               |                            |                |               |
| Urban/Rural area                                  |                             |                                                         |                |               |                     |                |               |                            |                |               |
|                                                   | Urban                       |                                                         |                |               |                     |                |               |                            |                |               |
|                                                   | Town/Fringe                 |                                                         |                |               |                     |                |               |                            |                |               |
|                                                   | Rural                       |                                                         |                |               |                     |                |               |                            |                |               |
|                                                   | Not known                   |                                                         |                |               |                     |                |               |                            |                |               |

<sup>a</sup> Weighted based<sup>b</sup> Unwell included 'not very well' and 'not at all well'<sup>c</sup> Well included 'very well' and 'fairly well'<sup>d</sup> Includes working full-time and part-time<sup>e</sup> Row counts do not add up to total because categories are non-mutually exclusive.

Suppl. Table 7. Cross-tabulation of working/furlough status against coping, suicidal thoughts and self-harm for data collected at wave 3 and wave 4.

| Wave   | Variable           | Category  | Employed (not furloughed) |                      |        | Employed (furloughed) |                      |        | Unemployed          |                      |        | Not working/Others  |                      |        | Full time student   |                      |        | Retired             |                      |        |
|--------|--------------------|-----------|---------------------------|----------------------|--------|-----------------------|----------------------|--------|---------------------|----------------------|--------|---------------------|----------------------|--------|---------------------|----------------------|--------|---------------------|----------------------|--------|
|        |                    |           | Counts <sup>a</sup>       | % <sup>a</sup>       | 95% CI | Counts <sup>a</sup>   | % <sup>a</sup>       | 95% CI | Counts <sup>a</sup> | % <sup>a</sup>       | 95% CI | Counts <sup>a</sup> | % <sup>a</sup>       | 95% CI | Counts <sup>a</sup> | % <sup>a</sup>       | 95% CI | Counts <sup>a</sup> | % <sup>a</sup>       | 95% CI |
| Wave 3 | Total <sup>b</sup> | N/A       | 1,804.2                   | 42.5 ( 41.0 , 44.0 ) |        | 443.1                 | 10.4 ( 9.5 , 11.4 )  |        | 198.0               | 4.7 ( 4.0 , 5.4 )    |        | 491.4               | 11.6 ( 10.6 , 12.6 ) |        | 245.7               | 5.8 ( 5.1 , 6.6 )    |        | 1,063.7             | 25.1 ( 23.8 , 26.4 ) |        |
|        | Coping             | No stress | 179.2                     | 10.2 ( 8.8 , 11.8 )  |        | 60.2                  | 13.9 ( 10.8 , 17.6 ) |        | 25.6                | 13.3 ( 9.1 , 19.1 )  |        | 75.7                | 16.2 ( 13.1 , 20.0 ) |        | 27.8                | 12.0 ( 8.0 , 17.7 )  |        | 246.0               | 23.3 ( 20.9 , 25.9 ) |        |
|        |                    | Well      | 1,364.9                   | 77.8 ( 75.8 , 79.8 ) |        | 308.2                 | 71.0 ( 66.3 , 75.2 ) |        | 115.3               | 60.0 ( 52.6 , 67.1 ) |        | 297.9               | 63.9 ( 59.3 , 68.2 ) |        | 152.7               | 65.9 ( 59.0 , 72.2 ) |        | 745.4               | 70.7 ( 68.0 , 73.3 ) |        |
|        |                    | Not well  | 209.4                     | 11.9 ( 10.5 , 13.6 ) |        | 65.8                  | 15.2 ( 11.9 , 19.1 ) |        | 51.2                | 26.7 ( 20.5 , 33.8 ) |        | 92.6                | 19.9 ( 16.4 , 23.8 ) |        | 51.2                | 22.1 ( 17.0 , 28.3 ) |        | 62.8                | 6.0 ( 4.7 , 7.5 )    |        |
|        | Suicidal thoughts  | Yes       | 147.7                     | 8.7 ( 7.4 , 10.2 )   |        | 37.5                  | 9.1 ( 6.5 , 12.4 )   |        | 37.2                | 20.5 ( 15.0 , 27.2 ) |        | 63.7                | 14.7 ( 11.6 , 18.4 ) |        | 34.1                | 15.3 ( 11.0 , 20.8 ) |        | 50.5                | 5.0 ( 3.8 , 6.5 )    |        |
|        | Self-harm          | Yes       | 35.1                      | 2.1 ( 1.4 , 2.9 )    |        | 8.9                   | 2.1 ( 1.0 , 4.2 )    |        | 7.5                 | 4.0 ( 1.9 , 8.4 )    |        | 17.4                | 4.0 ( 2.5 , 6.4 )    |        | 13.9                | 6.1 ( 3.5 , 10.4 )   |        | 5.5                 | 0.5 ( 0.2 , 1.2 )    |        |
| Wave 4 | Total              | N/A       | 1,963.9                   | 44.8 ( 43.3 , 46.4 ) |        | 414.4                 | 9.5 ( 8.5 , 10.4 )   |        | 181.9               | 4.2 ( 3.5 , 4.9 )    |        | 521.0               | 11.9 ( 10.9 , 12.9 ) |        | 218.4               | 5.0 ( 4.2 , 5.9 )    |        | 1,082.5             | 24.7 ( 23.5 , 26.0 ) |        |
|        | Coping             | No stress | 257.9                     | 13.4 ( 11.8 , 15.1 ) |        | 50.3                  | 12.2 ( 9.0 , 16.4 )  |        | 24.6                | 14.5 ( 9.3 , 21.8 )  |        | 52.7                | 10.6 ( 8.0 , 13.9 )  |        | 22.5                | 11.1 ( 6.4 , 18.6 )  |        | 284.7               | 26.6 ( 24.2 , 29.2 ) |        |
|        |                    | Well      | 1,414.7                   | 73.4 ( 71.2 , 75.4 ) |        | 294.0                 | 71.5 ( 66.3 , 76.2 ) |        | 97.5                | 57.5 ( 48.7 , 65.9 ) |        | 327.6               | 65.7 ( 61.1 , 70.0 ) |        | 134.5               | 66.4 ( 57.7 , 74.0 ) |        | 709.3               | 66.3 ( 63.5 , 68.9 ) |        |
|        |                    | Not well  | 255.3                     | 13.2 ( 11.7 , 15.0 ) |        | 66.7                  | 16.2 ( 12.5 , 20.8 ) |        | 47.4                | 28.0 ( 20.7 , 36.6 ) |        | 118.3               | 23.7 ( 20.0 , 27.9 ) |        | 45.7                | 22.5 ( 16.5 , 30.0 ) |        | 76.3                | 7.1 ( 5.8 , 8.7 )    |        |
|        | Suicidal thoughts  | Yes       | 173.9                     | 9.3 ( 8.0 , 10.9 )   |        | 45.3                  | 11.5 ( 8.5 , 15.3 )  |        | 37.2                | 21.5 ( 15.0 , 29.9 ) |        | 76.0                | 16.1 ( 12.9 , 19.9 ) |        | 46.0                | 23.1 ( 16.7 , 31.0 ) |        | 35.8                | 3.5 ( 2.5 , 4.7 )    |        |
|        | Self-harm          | Yes       | 27.0                      | 1.4 ( 0.9 , 2.2 )    |        | 9.2                   | 2.3 ( 1.1 , 4.8 )    |        | 7.1                 | 4.1 ( 1.8 , 8.9 )    |        | 18.7                | 3.9 ( 2.4 , 6.3 )    |        | 13.8                | 6.9 ( 3.9 , 12.0 )   |        | 2.5                 | 0.2 ( 0.1 , 0.8 )    |        |

<sup>a</sup> Weighted based  
<sup>b</sup> % of the whole respection sample size

Suppl. Table 8. Suicidal thoughts stratified by loneliness, coping and sample characteristics.

|                                  |                             | Wave 2 (02-03/04/2020)           |                |                | Wave 3 (24-26/04/2020)           |                |                | Wave 4 (28-29/05/2020)           |                |                |
|----------------------------------|-----------------------------|----------------------------------|----------------|----------------|----------------------------------|----------------|----------------|----------------------------------|----------------|----------------|
|                                  |                             | n = 2,105 (2,096.5) <sup>a</sup> |                |                | n = 3,969 (3,968.4) <sup>a</sup> |                |                | n = 4,148 (4,134.8) <sup>a</sup> |                |                |
|                                  |                             | Counts <sup>a</sup>              | % <sup>a</sup> | 95% CI         | Counts <sup>a</sup>              | % <sup>a</sup> | 95% CI         | Counts <sup>a</sup>              | % <sup>a</sup> | 95% CI         |
| Total                            |                             | 161.5                            | 7.7            | ( 6.6, 9.0 )   | 370.7                            | 9.4            | ( 8.5, 10.3 )  | 414.1                            | 10.0           | ( 9.1, 11.1 )  |
| Loneliness                       |                             | 88.0                             | 17.7           | ( 14.5, 21.5 ) | 223.6                            | 21.0           | ( 18.6, 23.6 ) | 252.4                            | 23.5           | ( 20.8, 26.4 ) |
| Coping <sup>b</sup>              | NA (no stress)              | 4.5                              | 1.9            | ( 0.7, 5.1 )   | 14.0                             | 2.5            | ( 1.4, 4.3 )   | 5.6                              | 0.9            | ( 0.3, 2.5 )   |
|                                  | Well                        | 74.5                             | 4.8            | ( 3.8, 6.1 )   | 167.7                            | 5.9            | ( 5.1, 6.9 )   | 174.4                            | 6.1            | ( 5.2, 7.2 )   |
|                                  | Not Well                    | 76.6                             | 29.3           | ( 24.0, 35.1 ) | 178.0                            | 36.8           | ( 32.4, 41.3 ) | 222.7                            | 39.2           | ( 34.9, 43.6 ) |
| Sex                              | Male                        | 81.1                             | 8.2            | ( 6.5, 10.2 )  | 164.7                            | 8.7            | ( 7.4, 10.1 )  | 163.2                            | 8.3            | ( 6.9, 9.9 )   |
|                                  | Female                      | 80.4                             | 7.3            | ( 5.9, 9.0 )   | 206.0                            | 10.0           | ( 8.8, 11.4 )  | 250.9                            | 11.6           | ( 10.3, 13.0 ) |
| Age (years)                      | 18-24                       | 27.7                             | 13.0           | ( 8.8, 18.6 )  | 75.1                             | 18.3           | ( 14.6, 22.6 ) | 97.5                             | 21.6           | ( 17.2, 26.9 ) |
|                                  | 25-34                       | 33.4                             | 9.9            | ( 7.0, 13.9 )  | 87.4                             | 13.7           | ( 11.2, 16.8 ) | 106.7                            | 16.4           | ( 13.4, 19.8 ) |
|                                  | 35-44                       | 43.0                             | 12.0           | ( 8.8, 16.0 )  | 71.5                             | 10.9           | ( 8.7, 13.7 )  | 80.6                             | 11.6           | ( 9.3, 14.4 )  |
|                                  | 45-54                       | 27.9                             | 8.2            | ( 5.7, 11.7 )  | 53.1                             | 8.1            | ( 6.3, 10.5 )  | 59.5                             | 8.2            | ( 6.5, 10.4 )  |
|                                  | 55+                         | 29.6                             | 3.5            | ( 2.5, 4.9 )   | 83.6                             | 5.2            | ( 4.2, 6.4 )   | 69.7                             | 4.3            | ( 3.4, 5.4 )   |
| Social grade                     | ABC1                        | 89.9                             | 7.5            | ( 6.1, 9.1 )   | 193.8                            | 8.5            | ( 7.4, 9.8 )   | 220.6                            | 9.3            | ( 8.1, 10.6 )  |
|                                  | C2DE                        | 71.6                             | 8.0            | ( 6.3, 10.2 )  | 176.9                            | 10.5           | ( 9.1, 12.1 )  | 193.5                            | 11.0           | ( 9.5, 12.7 )  |
| Marital status                   | Married/ Civil Partnership  | 39.7                             | 4.1            | ( 3.0, 5.6 )   | 101.1                            | 5.7            | ( 4.7, 6.9 )   | 108.8                            | 5.8            | ( 4.8, 6.9 )   |
|                                  | Living as married           | 16.8                             | 5.9            | ( 3.5, 9.8 )   | 43.7                             | 8.1            | ( 6.0, 11.0 )  | 56.6                             | 9.7            | ( 7.3, 12.9 )  |
|                                  | Separated/ Divorced         | 24.3                             | 12.3           | ( 8.3, 17.7 )  | 40.0                             | 11.4           | ( 8.4, 15.2 )  | 30.1                             | 8.7            | ( 6.2, 12.0 )  |
|                                  | Widowed                     | 3.4                              | 4.9            | ( 1.9, 12.5 )  | 8.4                              | 6.2            | ( 3.3, 11.6 )  | 3.4                              | 2.7            | ( 1.0, 6.9 )   |
|                                  | Never Married               | 76.3                             | 13.5           | ( 10.8, 16.8 ) | 171.8                            | 14.8           | ( 12.8, 17.1 ) | 213.3                            | 18.4           | ( 15.9, 21.1 ) |
|                                  | Not known                   | 1.0                              | 6.5            | ( 0.9, 34.9 )  | 5.8                              | 42.2           | ( 18.1, 70.7 ) | 1.9                              | 8.1            | ( 2.0, 27.8 )  |
| Working Status                   | Employed <sup>c</sup>       | 86.8                             | 7.2            | ( 5.9, 8.9 )   | 185.1                            | 8.8            | ( 7.6, 10.1 )  | 219.2                            | 9.7            | ( 8.4, 11.1 )  |
|                                  | Unemployed                  | 13.9                             | 17.3           | ( 9.7, 29.0 )  | 37.2                             | 20.5           | ( 15.0, 27.2 ) | 37.2                             | 21.5           | ( 15.0, 29.9 ) |
|                                  | Not working/Others          | 27.3                             | 13.6           | ( 9.4, 19.4 )  | 63.7                             | 14.7           | ( 11.6, 18.4 ) | 76.0                             | 16.1           | ( 12.9, 19.9 ) |
|                                  | Full time student           | 17.0                             | 14.1           | ( 8.8, 21.7 )  | 34.1                             | 15.3           | ( 11.0, 20.8 ) | 46.0                             | 23.1           | ( 16.7, 31.0 ) |
|                                  | Retired                     | 16.5                             | 3.3            | ( 2.1, 5.2 )   | 50.5                             | 5.0            | ( 3.8, 6.5 )   | 35.8                             | 3.5            | ( 2.5, 4.7 )   |
| Mental health condition/         | No                          | -                                | -              | ( -, - )       | 153.7                            | 5.2            | ( 4.4, 6.1 )   | 139.7                            | 4.6            | ( 3.9, 5.5 )   |
| Psychiatric diagnosis            | Yes                         | -                                | -              | ( -, - )       | 183.4                            | 22.5           | ( 19.7, 25.5 ) | 226.2                            | 25.4           | ( 22.4, 28.6 ) |
|                                  | Prefer not to say/not known | -                                | -              | ( -, - )       | 33.6                             | 17.0           | ( 12.1, 23.3 ) | 48.2                             | 23.4           | ( 17.5, 30.5 ) |
| Being parent/guardian            |                             | 68.3                             | 5.7            | ( 4.5, 7.3 )   | 151.8                            | 7.0            | ( 5.9, 8.1 )   | 150.0                            | 6.6            | ( 5.6, 7.7 )   |
| Number of children               | 0                           | 106.3                            | 7.1            | ( 5.9, 8.5 )   | 269.7                            | 9.2            | ( 8.2, 10.3 )  | 291.5                            | 9.8            | ( 8.7, 11.0 )  |
| in household                     | 1                           | 29.0                             | 11.2           | ( 7.7, 16.0 )  | 40.9                             | 9.1            | ( 6.7, 12.3 )  | 65.9                             | 12.5           | ( 9.6, 16.1 )  |
|                                  | 2                           | 15.6                             | 7.6            | ( 4.5, 12.4 )  | 40.1                             | 10.4           | ( 7.6, 13.9 )  | 37.7                             | 9.5            | ( 6.9, 13.0 )  |
|                                  | 3+                          | 7.5                              | 8.7            | ( 3.8, 18.8 )  | 13.4                             | 9.7            | ( 5.3, 17.1 )  | 15.5                             | 9.4            | ( 5.5, 15.8 )  |
|                                  | Refused to answer           | 3.1                              | 6.9            | ( 2.2, 19.5 )  | 6.5                              | 11.0           | ( 4.7, 23.9 )  | 3.6                              | 6.0            | ( 2.2, 15.0 )  |
| Living arrangements <sup>d</sup> | Alone                       | -                                | -              | ( -, - )       | 85.2                             | 10.9           | ( 8.8, 13.3 )  | 99.5                             | 13.9           | ( 11.4, 16.9 ) |
|                                  | Spouse/partner              | -                                | -              | ( -, - )       | 148.7                            | 6.6            | ( 5.6, 7.7 )   | 157.3                            | 6.4            | ( 5.4, 7.5 )   |
|                                  | Relative(s)                 | -                                | -              | ( -, - )       | 150.2                            | 11.1           | ( 9.5, 13.0 )  | 174.0                            | 11.4           | ( 9.7, 13.3 )  |
|                                  | Friend(s)/housemate(s)      | -                                | -              | ( -, - )       | 39.4                             | 22.4           | ( 16.5, 29.7 ) | 23.2                             | 19.5           | ( 13.2, 27.9 ) |
| Urban/Rural area                 | Urban                       | -                                | -              | ( -, - )       | 297.2                            | 10.0           | ( 8.9, 11.2 )  | 328.3                            | 10.6           | ( 9.4, 11.8 )  |
|                                  | Town/Fringe                 | -                                | -              | ( -, - )       | 34.1                             | 8.8            | ( 6.4, 12.1 )  | 30.3                             | 7.4            | ( 5.2, 10.6 )  |
|                                  | Rural                       | -                                | -              | ( -, - )       | 25.7                             | 5.2            | ( 3.6, 7.5 )   | 49.3                             | 9.7            | ( 7.2, 12.9 )  |
|                                  | Not known                   | -                                | -              | ( -, - )       | 13.7                             | 13.1           | ( 8.0, 20.7 )  | 6.3                              | 5.6            | ( 2.7, 11.3 )  |

<sup>a</sup> Weighted based<sup>b</sup> Row counts do not add up to total because respondents who answered 'prefer not to say' or 'don't know' for coping were excluded<sup>c</sup> Includes working full-time and part-time<sup>d</sup> Row counts do not add up to total because categories are non-mutually exclusive.

Suppl. Table 9. Self-harm stratified by loneliness, coping and sample characteristics.

|                                  |                             | Wave 2 (02-03/04/2020)           |                |                | Wave 3 (24-26/04/2020)           |                |                | Wave 4 (28-29/05/2020)           |                |                |
|----------------------------------|-----------------------------|----------------------------------|----------------|----------------|----------------------------------|----------------|----------------|----------------------------------|----------------|----------------|
|                                  |                             | n = 2,117 (2,111.1) <sup>a</sup> |                |                | n = 3,997 (3,988.4) <sup>a</sup> |                |                | n = 4,168 ( 4,1562) <sup>a</sup> |                |                |
|                                  |                             | Counts <sup>a</sup>              | % <sup>a</sup> | 95% CI         | Counts <sup>a</sup>              | % <sup>a</sup> | 95% CI         | Counts <sup>a</sup>              | % <sup>a</sup> | 95% CI         |
| Total                            |                             | 39.5                             | 1.9            | ( 1.3 , 2.6 )  | 88.3                             | 2.2            | ( 1.8 , 2.8 )  | 78.3                             | 1.9            | ( 1.5 , 2.4 )  |
| Loneliness                       |                             | 26.7                             | 5.4            | ( 3.5 , 8.0 )  | 44.8                             | 4.1            | ( 3.0 , 5.7 )  | 43.0                             | 4.0            | ( 2.8 , 5.6 )  |
| Coping <sup>b</sup>              | NA (no stress)              | 0.0                              | 0.0            | ( 0.0 , 0.0 )  | 3.4                              | 0.6            | ( 0.2 , 1.9 )  | 0.8                              | 0.1            | ( 0.0 , 0.9 )  |
|                                  | Well                        | 15.1                             | 1.0            | ( 0.5 , 1.7 )  | 31.2                             | 1.1            | ( 0.8 , 1.6 )  | 27.0                             | 0.9            | ( 0.6 , 1.4 )  |
|                                  | Not Well                    | 22.7                             | 8.4            | ( 5.5 , 12.7 ) | 49.6                             | 9.9            | ( 7.4 , 13.1 ) | 49.6                             | 8.7            | ( 6.4 , 11.6 ) |
| Sex                              | Male                        | 17.1                             | 1.7            | ( 0.9 , 3.0 )  | 31.8                             | 1.7            | ( 1.1 , 2.5 )  | 32.1                             | 1.6            | ( 1.1 , 2.4 )  |
|                                  | Female                      | 22.4                             | 2.0            | ( 1.4 , 3.0 )  | 56.5                             | 2.7            | ( 2.1 , 3.5 )  | 46.2                             | 2.1            | ( 1.6 , 2.9 )  |
| Age (years)                      | 18-24                       | 9.1                              | 4.2            | ( 2.0 , 8.4 )  | 23.7                             | 5.7            | ( 3.7 , 8.6 )  | 24.1                             | 5.4            | ( 3.3 , 8.6 )  |
|                                  | 25-34                       | 8.7                              | 2.5            | ( 1.2 , 5.5 )  | 25.1                             | 3.9            | ( 2.6 , 5.9 )  | 22.7                             | 3.5            | ( 2.2 , 5.5 )  |
|                                  | 35-44                       | 12.4                             | 3.4            | ( 1.9 , 6.2 )  | 21.0                             | 3.2            | ( 2.0 , 5.1 )  | 11.0                             | 1.6            | ( 0.9 , 2.7 )  |
|                                  | 45-54                       | 3.5                              | 1.0            | ( 0.3 , 3.1 )  | 7.7                              | 1.2            | ( 0.6 , 2.3 )  | 14.1                             | 1.9            | ( 1.2 , 3.3 )  |
|                                  | 55+                         | 5.8                              | 0.7            | ( 0.3 , 1.5 )  | 10.9                             | 0.7            | ( 0.4 , 1.2 )  | 6.4                              | 0.4            | ( 0.2 , 0.8 )  |
| Social grade                     | ABC1                        | 21.1                             | 1.7            | ( 1.1 , 2.8 )  | 48.2                             | 2.1            | ( 1.6 , 2.8 )  | 36.9                             | 1.5            | ( 1.1 , 2.1 )  |
|                                  | C2DE                        | 18.4                             | 2.1            | ( 1.2 , 3.4 )  | 40.0                             | 2.3            | ( 1.7 , 3.3 )  | 41.4                             | 2.3            | ( 1.6 , 3.3 )  |
| Marital status                   | Married/ Civil Partnership  | 5.8                              | 0.6            | ( 0.2 , 1.5 )  | 23.9                             | 1.4            | ( 0.9 , 2.1 )  | 19.3                             | 1.0            | ( 0.7 , 1.6 )  |
|                                  | Living as married           | 1.8                              | 0.6            | ( 0.2 , 2.4 )  | 16.1                             | 3.0            | ( 1.8 , 4.9 )  | 14.4                             | 2.5            | ( 1.4 , 4.4 )  |
|                                  | Separated/ Divorced         | 7.4                              | 3.7            | ( 1.7 , 7.7 )  | 6.1                              | 1.7            | ( 0.8 , 3.9 )  | 5.5                              | 1.6            | ( 0.7 , 3.5 )  |
|                                  | Widowed                     | 0.0                              | 0.0            | ( 0.0 , 0.0 )  | 0.9                              | 0.6            | ( 0.1 , 4.4 )  | 0.0                              | 0.0            | ( 0.0 , 0.0 )  |
|                                  | Never Married               | 23.3                             | 4.1            | ( 2.6 , 6.4 )  | 41.2                             | 3.5            | ( 2.5 , 4.9 )  | 39.1                             | 3.3            | ( 2.3 , 4.8 )  |
|                                  | Not known                   | 1.1                              | 7.3            | ( 1.0 , 37.5 ) | 0.0                              | 0.0            | ( 0.0 , 0.0 )  | 0.0                              | 0.0            | ( 0.0 , 0.0 )  |
| Working Status                   | Employed <sup>c</sup>       | 17.3                             | 1.4            | ( 0.9 , 2.4 )  | 43.9                             | 2.1            | ( 1.5 , 2.8 )  | 36.2                             | 1.6            | ( 1.1 , 2.3 )  |
|                                  | Unemployed                  | 6.3                              | 7.7            | ( 2.9 , 18.9 ) | 7.5                              | 4.0            | ( 1.9 , 8.4 )  | 7.1                              | 4.1            | ( 1.8 , 8.9 )  |
|                                  | Not working/Others          | 7.4                              | 3.6            | ( 1.7 , 7.4 )  | 17.4                             | 4.0            | ( 2.5 , 6.4 )  | 18.7                             | 3.9            | ( 2.4 , 6.3 )  |
|                                  | Full time student           | 5.7                              | 4.6            | ( 1.8 , 10.9 ) | 13.9                             | 6.1            | ( 3.5 , 10.4 ) | 13.8                             | 6.9            | ( 3.9 , 12.0 ) |
|                                  | Retired                     | 2.8                              | 0.6            | ( 0.2 , 1.7 )  | 5.5                              | 0.5            | ( 0.2 , 1.2 )  | 2.5                              | 0.2            | ( 0.1 , 0.8 )  |
| Mental health condition/         | No                          | -                                | -              | ( - , - )      | 30.5                             | 1.0            | ( 0.7 , 1.5 )  | 17.9                             | 0.6            | ( 0.4 , 0.9 )  |
| Psychiatric diagnosis            | Yes                         | -                                | -              | ( - , - )      | 47.1                             | 5.7            | ( 4.3 , 7.6 )  | 48.4                             | 5.4            | ( 3.9 , 7.3 )  |
|                                  | Prefer not to say/not known | -                                | -              | ( - , - )      | 10.7                             | 5.2            | ( 2.7 , 9.8 )  | 12.1                             | 5.7            | ( 3.0 , 10.7 ) |
| Being parent/guardian            |                             | 16.5                             | 1.4            | ( 0.8 , 2.3 )  | 33.2                             | 1.5            | ( 1.0 , 2.2 )  | 28.2                             | 1.2            | ( 0.9 , 1.8 )  |
| Number of children               | 0                           | 22.1                             | 1.5            | ( 0.9 , 2.3 )  | 61.7                             | 2.1            | ( 1.6 , 2.7 )  | 50.4                             | 1.7            | ( 1.2 , 2.3 )  |
| in household                     | 1                           | 9.3                              | 3.5            | ( 1.7 , 7.1 )  | 10.1                             | 2.3            | ( 1.2 , 4.2 )  | 12.5                             | 2.4            | ( 1.2 , 4.7 )  |
|                                  | 2                           | 4.1                              | 2.0            | ( 0.6 , 6.5 )  | 9.0                              | 2.3            | ( 1.1 , 4.7 )  | 7.9                              | 2.0            | ( 1.0 , 4.0 )  |
|                                  | 3+                          | 3.0                              | 3.4            | ( 1.1 , 10.0 ) | 4.9                              | 3.6            | ( 1.3 , 9.6 )  | 4.8                              | 3.0            | ( 1.2 , 7.2 )  |
|                                  | Refused to answer           | 1.0                              | 2.2            | ( 0.3 , 14.2 ) | 2.5                              | 4.4            | ( 1.1 , 16.4 ) | 2.7                              | 4.3            | ( 1.4 , 12.7 ) |
| Living arrangements <sup>d</sup> | Alone                       | -                                | -              | ( - , - )      | 19.7                             | 2.5            | ( 1.5 , 4.0 )  | 13.5                             | 1.9            | ( 1.0 , 3.4 )  |
|                                  | Spouse/partner              | -                                | -              | ( - , - )      | 37.4                             | 1.7            | ( 1.2 , 2.3 )  | 28.0                             | 1.1            | ( 0.8 , 1.7 )  |
|                                  | Relative(s)                 | -                                | -              | ( - , - )      | 31.6                             | 2.3            | ( 1.6 , 3.4 )  | 38.3                             | 2.5            | ( 1.8 , 3.5 )  |
|                                  | Friend(s)/housemate(s)      | -                                | -              | ( - , - )      | 10.7                             | 6.0            | ( 3.0 , 11.4 ) | 5.4                              | 4.5            | ( 1.9 , 10.5 ) |
| Urban/Rural area                 | Urban                       | -                                | -              | ( - , - )      | 76.6                             | 2.6            | ( 2.0 , 3.2 )  | 56.1                             | 1.8            | ( 1.3 , 2.4 )  |
|                                  | Town/Fringe                 | -                                | -              | ( - , - )      | 5.8                              | 1.5            | ( 0.7 , 3.4 )  | 5.3                              | 1.3            | ( 0.6 , 2.9 )  |
|                                  | Rural                       | -                                | -              | ( - , - )      | 3.2                              | 0.6            | ( 0.2 , 2.0 )  | 16.9                             | 3.3            | ( 1.9 , 5.6 )  |
|                                  | Not known                   | -                                | -              | ( - , - )      | 2.6                              | 2.5            | ( 0.8 , 7.4 )  | 0.0                              | 0.0            | ( 0.0 , 0.0 )  |

<sup>a</sup> Weighted based<sup>b</sup> Row counts do not add up to total because respondents who answered 'prefer not to say' or 'don't know' for coping were excluded<sup>c</sup> Includes working full-time and part-time<sup>d</sup> Row counts do not add up to total because categories are non-mutually exclusive.

Suppl. Table 10. Summary of binomial regression of suicidal thoughts for data collected at wave 3 and wave 4.

| Variable                                          | Reference                 | Category                    | Unadjusted model |         |              |                      |         |                    | Adjusted model  |         |              |                     |         |        |
|---------------------------------------------------|---------------------------|-----------------------------|------------------|---------|--------------|----------------------|---------|--------------------|-----------------|---------|--------------|---------------------|---------|--------|
|                                                   |                           |                             | Risk Ratio (RR)  |         |              | Risk Difference (RD) |         |                    | Risk Ratio (RR) |         |              | Effect of variable* |         |        |
|                                                   |                           |                             | RR               | p-value | 95% CI       | RD                   | p-value | 95% CI             | RR              | p-value | 95% CI       | $\chi^2$ (df)       | p-value | RD     |
| Wave                                              | Wave 3                    | Wave 4                      | 1.1              | 0.350   | ( 0.9, 1.2 ) | 0.007                | 0.350   | ( -0.007, 0.020 )  | 0.9             | 0.510   | ( 0.7, 1.2 ) | 0.4 (1)             | 0.510   | 0.008  |
| Loneliness                                        | No                        | Yes                         | 4.3              | <0.001  | ( 3.7, 5.0 ) | 0.171                | <0.001  | ( 0.200, 0.200 )   | 1.8             | <0.001  | ( 1.5, 2.1 ) | 40.3 (1)            | <0.001  | 0.053  |
| Coping                                            | Well                      | NA (no stress)              | 0.3              | <0.001  | ( 0.2, 0.4 ) | -0.044               | <0.001  | ( -0.054, -0.034 ) | 0.3             | <0.001  | ( 0.2, 0.6 ) | 206.2 (2)           | <0.001  | -0.041 |
|                                                   |                           | Not well                    | 6.3              | <0.001  | ( 5.5, 7.2 ) | 0.321                | <0.001  | ( 0.289, 0.353 )   | 3.4             | <0.001  | ( 2.8, 4.0 ) |                     |         | 0.150  |
| Sex                                               | Male                      | Female                      | 1.3              | 0.001   | ( 1.1, 1.5 ) | 0.024                | <0.001  | ( 0.010, 0.038 )   | 1.0             | 0.470   | ( 0.9, 1.2 ) | 0.5 (1)             | 0.470   | 0.005  |
| Age (years)                                       | 55+                       | 18-24                       | 4.2              | <0.001  | ( 3.4, 5.3 ) | 0.153                | <0.001  | ( 0.120, 0.186 )   | 1.7             | 0.005   | ( 1.2, 2.4 ) | 9.4 (4)             | 0.051   | 0.048  |
|                                                   |                           | 25-34                       | 3.2              | <0.001  | ( 2.6, 3.9 ) | 0.103                | <0.001  | ( 0.081, 0.126 )   | 1.5             | 0.023   | ( 1.1, 2.1 ) |                     |         | 0.034  |
|                                                   |                           | 35-44                       | 2.4              | <0.001  | ( 1.9, 3.0 ) | 0.065                | <0.001  | ( 0.046, 0.085 )   | 1.4             | 0.049   | ( 1.0, 1.9 ) |                     |         | 0.026  |
|                                                   |                           | 45-54                       | 1.7              | <0.001  | ( 1.4, 2.2 ) | 0.034                | <0.001  | ( 0.018, 0.050 )   | 1.2             | 0.240   | ( 0.9, 1.6 ) |                     |         | 0.014  |
| Social grade                                      | ABC1                      | C2DE                        | 1.2              | 0.010   | ( 1.0, 1.4 ) | 0.018                | 0.011   | ( 0.004, 0.032 )   | 1.1             | 0.200   | ( 1.0, 1.3 ) | 1.7 (1)             | 0.200   | 0.008  |
| Marital status                                    | Married/Civil Partnership | Living as married           | 1.6              | <0.001  | ( 1.2, 2.0 ) | 0.032                | 0.002   | ( 0.012, 0.052 )   | 0.9             | 0.380   | ( 0.7, 1.1 ) | 2.6 (4)             | 0.630   | -0.010 |
|                                                   |                           | Separated/ Divorced         | 1.7              | <0.001  | ( 1.3, 2.3 ) | 0.043                | <0.001  | ( 0.019, 0.066 )   | 1.1             | 0.720   | ( 0.7, 1.6 ) |                     |         | 0.006  |
|                                                   |                           | Widowed                     | 0.8              | 0.370   | ( 0.4, 1.3 ) | -0.013               | 0.320   | ( -0.038, 0.012 )  | 0.8             | 0.420   | ( 0.4, 1.4 ) |                     |         | -0.021 |
|                                                   |                           | Never Married               | 2.9              | <0.001  | ( 2.4, 3.4 ) | 0.109                | <0.001  | ( 0.090, 0.127 )   | 1.1             | 0.690   | ( 0.8, 1.5 ) |                     |         | 0.007  |
| Working status                                    | Employed                  | Unemployed                  | 2.3              | <0.001  | ( 1.8, 2.9 ) | 0.117                | <0.001  | ( 0.068, 0.167 )   | 1.1             | 0.150   | ( 1.0, 1.4 ) | 2.3 (4)             | 0.690   | 0.014  |
|                                                   |                           | Not working/Others          | 1.7              | <0.001  | ( 1.4, 2.0 ) | 0.062                | <0.001  | ( 0.035, 0.088 )   | 1.1             | 0.490   | ( 0.9, 1.3 ) |                     |         | 0.005  |
|                                                   |                           | Full time student           | 2.1              | <0.001  | ( 1.6, 2.6 ) | 0.097                | <0.001  | ( 0.054, 0.141 )   | 1.1             | 0.610   | ( 0.8, 1.3 ) |                     |         | 0.007  |
|                                                   |                           | Retired                     | 0.5              | <0.001  | ( 0.4, 0.6 ) | -0.050               | <0.001  | ( -0.063, -0.038 ) | 1.0             | 0.770   | ( 0.8, 1.4 ) |                     |         | 0.006  |
|                                                   |                           |                             |                  |         |              |                      |         |                    |                 |         |              |                     |         |        |
| Mental health condition/<br>Psychiatric diagnosis | No                        | Yes                         | 4.9              | <0.001  | ( 4.2, 5.7 ) | 0.191                | <0.001  | ( 0.169, 0.214 )   | 2.2             | <0.001  | ( 1.9, 2.7 ) | 87.7 (2)            | <0.001  | 0.077  |
|                                                   |                           | Prefer not to say/not known | 4.1              | <0.001  | ( 3.2, 5.3 ) | 0.154                | <0.001  | ( 0.110, 0.198 )   | 2.5             | <0.001  | ( 1.9, 3.1 ) |                     |         | 0.089  |
| Being parent/guardian                             | No                        | Yes                         | 0.5              | <0.001  | ( 0.4, 0.6 ) | -0.066               | <0.001  | ( -0.080, -0.051 ) | 0.9             | 0.350   | ( 0.7, 1.1 ) | 0.9 (1)             | 0.350   | -0.010 |
| Number of children in household                   | 0                         | 1                           | 1.2              | 0.190   | ( 0.9, 1.4 ) | 0.015                | 0.220   | ( -0.009, 0.038 )  | 0.9             | 0.480   | ( 0.7, 1.1 ) | 1.3 (3)             | 0.730   | -0.007 |
|                                                   |                           | 2                           | 1.0              | 0.720   | ( 0.8, 1.3 ) | 0.004                | 0.720   | ( -0.019, 0.027 )  | 1.1             | 0.580   | ( 0.8, 1.4 ) |                     |         | 0.007  |
|                                                   |                           | 3+                          | 1.0              | 0.980   | ( 0.7, 1.5 ) | 0.001                | 0.980   | ( -0.038, 0.039 )  | 1.0             | 0.860   | ( 0.7, 1.5 ) |                     |         | 0.003  |
| Living alone                                      | No                        | Yes                         | 1.4              | <0.001  | ( 1.2, 1.6 ) | 0.032                | <0.001  | ( 0.014, 0.051 )   | 1.2             | 0.210   | ( 0.9, 1.6 ) | 1.6 (1)             | 0.210   | 0.019  |
| Living with spouse/partner                        | No                        | Yes                         | 0.5              | <0.001  | ( 0.4, 0.5 ) | -0.077               | <0.001  | ( -0.092, -0.062 ) | 1.0             | 0.990   | ( 0.7, 1.5 ) | 0.0 (1)             | 0.990   | 0.000  |
| Living with relative(s)                           | No                        | Yes                         | 1.3              | 0.001   | ( 1.1, 1.5 ) | 0.024                | 0.002   | ( 0.009, 0.039 )   | 1.1             | 0.390   | ( 0.9, 1.5 ) | 0.8 (1)             | 0.390   | 0.012  |
| Living with friend(s)/housemate(s)                | No                        | Yes                         | 2.3              | <0.001  | ( 1.8, 2.9 ) | 0.120                | <0.001  | ( 0.070, 0.169 )   | 1.1             | 0.540   | ( 0.8, 1.6 ) | 0.4 (1)             | 0.540   | 0.011  |
| Urban/Rural area                                  | Rural                     | Urban                       | 1.4              | 0.012   | ( 1.1, 1.7 ) | 0.028                | 0.005   | ( 0.008, 0.047 )   | 1.0             | 0.910   | ( 0.8, 1.2 ) | 0.1 (2)             | 0.960   | -0.001 |
|                                                   |                           | Town/Fringe                 | 1.1              | 0.660   | ( 0.8, 1.5 ) | 0.006                | 0.660   | ( -0.020, 0.032 )  | 1.0             | 0.780   | ( 0.7, 1.3 ) |                     |         | -0.004 |
| Wave × Loneliness                                 | Wave 3, Not lonely        | Wave 4 × Lonely             | -                | -       | ( -,- )      | -                    | -       | ( -,- )            | 0.9             | 0.590   | ( 0.6, 1.3 ) | 0.3 (1)             | 0.590   | -0.005 |
| Wave × Coping                                     | Wave 3, NA (no stress)    | Wave 4 × Well               | -                | -       | ( -,- )      | -                    | -       | ( -,- )            | 2.2             | 0.240   | ( 0.6, 7.8 ) | 1.6 (2)             | 0.460   | 0.019  |
|                                                   |                           | Wave 4 × Not well           | -                | -       | ( -,- )      | -                    | -       | ( -,- )            | 2.3             | 0.210   | ( 0.6, 8.6 ) |                     |         | 0.041  |
| Wave × Sex                                        | Wave 3, Male              | Wave 4 × Female             | -                | -       | ( -,- )      | -                    | -       | ( -,- )            | 1.2             | 0.180   | ( 0.9, 1.5 ) | 1.8 (1)             | 0.180   | 0.016  |
| Wave × Age                                        | Wave 3, 55+               | Wave 4 × 18-24              | -                | -       | ( -,- )      | -                    | -       | ( -,- )            | 0.8             | 0.500   | ( 0.5, 1.5 ) | 0.8 (4)             | 0.940   | -0.017 |
|                                                   |                           | Wave 4 × 25-34              | -                | -       | ( -,- )      | -                    | -       | ( -,- )            | 0.9             | 0.840   | ( 0.5, 1.7 ) |                     |         | -0.001 |
|                                                   |                           | Wave 4 × 35-44              | -                | -       | ( -,- )      | -                    | -       | ( -,- )            | 0.9             | 0.730   | ( 0.5, 1.6 ) |                     |         | -0.006 |
|                                                   |                           | Wave 4 × 45-54              | -                | -       | ( -,- )      | -                    | -       | ( -,- )            | 0.9             | 0.820   | ( 0.5, 1.6 ) |                     |         | -0.004 |
| Wave × Working status                             | Wave 3, Employed          | Wave 4 × Unemployed         | -                | -       | ( -,- )      | -                    | -       | ( -,- )            | 1.1             | 0.500   | ( 0.8, 1.6 ) | 5.3 (4)             | 0.260   | 0.015  |
|                                                   |                           | Wave 4 × Not working/Others | -                | -       | ( -,- )      | -                    | -       | ( -,- )            | 0.9             | 0.510   | ( 0.6, 1.2 ) |                     |         | -0.010 |
|                                                   |                           | Wave 4 × Full time student  | -                | -       | ( -,- )      | -                    | -       | ( -,- )            | 1.3             | 0.330   | ( 0.8, 2.1 ) |                     |         | 0.023  |
|                                                   |                           | Wave 4 × Retired            | -                | -       | ( -,- )      | -                    | -       | ( -,- )            | 0.6             | 0.076   | ( 0.3, 1.1 ) |                     |         | -0.054 |

\* Based on Wald chi-square test; df: degree of freedom

Suppl. Table 11. Summary of binomial regression of self-harm for data collected at wave 3 and wave 4.

| Variable                                          | Reference                 | Category                    | Unadjusted model |          |             |                      |         |                  | Adjusted model  |         |             |                      |                 |                 |
|---------------------------------------------------|---------------------------|-----------------------------|------------------|----------|-------------|----------------------|---------|------------------|-----------------|---------|-------------|----------------------|-----------------|-----------------|
|                                                   |                           |                             | Risk Ratio (RR)  |          |             | Risk Difference (RD) |         |                  | Risk Ratio (RR) |         |             | Risk Difference (RD) |                 |                 |
|                                                   |                           |                             | RR               | p-value  | 95% CI      | RD                   | p-value | 95% CI           | RR              | p-value | 95% CI      | $\chi^2$ (df)        | p-value         | RD              |
| Wave                                              | Wave 3                    | Wave 4                      | 0.9              | 0.340    | (0.6, 1.2)  | -0.003               | 0.330   | (-0.010, 0.003)  | 0.6             | 0.150   | (0.3, 1.2)  | 2.0 (1)              | 0.150           | -0.001          |
| Loneliness                                        | No                        | Yes                         | 3.1              | <0.001   | (2.2, 4.3)  | 0.028                | <0.001  | (0.018, 0.037)   | 1.2             | 0.360   | (0.8, 1.7)  | 0.9 (1)              | 0.360           | 0.003           |
| Coping                                            | Well                      | NA (no stress)              | 0.3              | 0.043    | (0.1, 1.0)  | -0.007               | 0.003   | (-0.011, -0.002) | 0.4             | 0.160   | (0.1, 1.4)  | 64.6 (2)             | <0.001          | -0.005          |
|                                                   |                           | Not well                    | 9.1              | <0.001   | (6.5, 12.8) | 0.082                | <0.001  | (0.063, 0.102)   | 4.6             | <0.001  | (3.1, 6.8)  |                      | 0.040           | <0.001          |
| Sex                                               | Male                      | Female                      | 1.5              | 0.030    | (1.0, 2.1)  | 0.008                | 0.023   | (0.001, 0.014)   | 1.1             | 0.520   | (0.8, 1.6)  | 0.4 (1)              | 0.520           | 0.003           |
| Age (years)                                       | 55+                       | 18-24                       | 10.4             | <0.001   | (5.9, 18.2) | 10.400               | <0.001  | (5.900, 18.200)  | 5.7             | <0.001  | (2.3, 14.2) | 15.3 (4)             | 0.004           | 0.034           |
|                                                   |                           | 25-34                       | 6.9              | <0.001   | (4.0, 12.1) | 6.900                | <0.001  | (4.000, 12.100)  | 4.0             | <0.001  | (1.8, 9.0)  |                      | 0.022           | <0.001          |
|                                                   |                           | 35-44                       | 4.4              | <0.001   | (2.4, 7.9)  | 4.400                | <0.001  | (2.400, 7.900)   | 2.8             | 0.007   | (1.3, 5.9)  |                      | 0.014           | <0.001          |
|                                                   |                           | 45-54                       | 3.0              | <0.001   | (1.6, 5.6)  | 3.000                | <0.001  | (1.600, 5.600)   | 2.0             | 0.068   | (1.0, 4.1)  |                      | 0.007           | 0.057           |
| Social grade                                      | ABC1                      | C2DE                        | 1.3              | 0.130    | (0.9, 1.8)  | 0.005                | 0.14    | (-0.002, 0.012)  | 1.2             | 0.470   | (0.8, 1.7)  | 0.5 (1)              | 0.470           | 0.003           |
| Marital status                                    | Married/Civil Partnership | Living as married           | 2.3              | <0.001   | (1.4, 3.7)  | 0.015                | 0.006   | (0.004, 0.026)   | 1.2             | 0.590   | (0.6, 2.1)  | 3.4 (4)              | 0.500           | 0.005           |
|                                                   |                           | Separated/ Divorced         | 1.4              | 0.300    | (0.7, 2.7)  | 0.005                | 0.360   | (-0.005, 0.015)  | 0.8             | 0.560   | (0.3, 1.9)  |                      | -0.006          | 0.550           |
|                                                   |                           | Widowed                     | 0.3              | 0.200    | (0.0, 2.0)  | -0.009               | 0.021   | (-0.016, -0.001) | 0.4             | 0.360   | (0.0, 3.0)  |                      | -0.017          | 0.190           |
|                                                   |                           | Never Married               | 2.9              | <0.001   | (2.0, 4.3)  | 0.023                | <0.001  | (0.013, 0.032)   | 0.6             | 0.170   | (0.3, 1.3)  |                      | -0.011          | 0.220           |
| Working status                                    | Employed                  | Unemployed                  | 2.2              | 0.010    | (1.2, 4.0)  | 0.022                | 0.055   | (-0.001, 0.045)  | 1.1             | 0.780   | (0.6, 2.2)  | 6.9 (4)              | 0.140           | 0.002           |
|                                                   |                           | Not working/Others          | 2.2              | <0.001   | (1.4, 3.3)  | 0.021                | 0.003   | (0.007, 0.035)   | 1.5             | 0.100   | (0.9, 2.5)  |                      | 0.009           | 0.140           |
|                                                   |                           | Full time student           | 3.6              | <0.001   | (2.3, 5.7)  | 0.047                | <0.001  | (0.021, 0.073)   | 1.7             | 0.072   | (1.0, 2.9)  |                      | 0.013           | 0.110           |
|                                                   |                           | Retired                     | 0.2              | <0.001   | (0.1, 0.4)  | -0.014               | <0.001  | (-0.019, -0.009) | 0.7             | 0.390   | (0.3, 1.6)  |                      | -0.005          | 0.370           |
| Mental health condition/<br>Psychiatric diagnosis | No                        | Yes                         | 6.9              | <0.001   | (4.8, 10.0) | 0.047                | <0.001  | (0.036, 0.059)   | 2.8             | <0.001  | (1.9, 4.2)  | 33.1 (2)             | <0.001          | 0.020           |
|                                                   |                           | Prefer not to say/not known | 6.8              | <0.001   | (4.0, 11.8) | 0.047                | <0.001  | (0.022, 0.072)   | 3.8             | <0.001  | (2.1, 6.8)  |                      | 0.030           | <0.001          |
| Being parent/guardian                             | No                        | Yes                         | 0.5              | <0.001   | (0.3, 0.7)  | -0.015               | <0.001  | (-0.022, -0.008) | 1.4             | 0.280   | (0.8, 2.4)  | 1.2 (1)              | 0.280           | 0.007           |
| Number of children in household                   | 0                         | 1                           | 1.2              | 0.430    | (0.7, 2.1)  | 0.004                | 0.460   | (-0.007, 0.016)  | 0.8             | 0.510   | (0.4, 1.6)  | 1.8 (3)              | 0.610           | -0.004          |
|                                                   |                           | 2                           | 1.1              | 0.630    | (0.7, 2.0)  | 0.003                | 0.650   | (-0.009, 0.014)  | 1.1             | 0.870   | (0.6, 2.0)  |                      | 0.001           | 0.870           |
|                                                   |                           | 3+                          | 1.7              | 0.130    | (0.8, 3.5)  | 0.013                | 0.240   | (-0.009, 0.036)  | 1.4             | 0.420   | (0.6, 3.1)  |                      | 0.008           | 0.480           |
| Living alone                                      | No                        | Yes                         | 1.1              | 0.690    | (0.7, 1.6)  | 0.002                | 0.700   | (-0.007, 0.011)  | 1.1             | 0.770   | (0.5, 2.3)  | 0.1 (1)              | 0.770           | 0.002           |
| Living with spouse/partner                        | No                        | Yes                         | 0.5              | <0.001   | (0.3, 0.6)  | -0.016               | <0.001  | (-0.023, -0.009) | 0.5             | 0.110   | (0.2, 1.2)  | 2.6 (1)              | 0.110           | -0.014          |
| Living with relative(s)                           | No                        | Yes                         | 1.3              | 0.100    | (0.9, 1.8)  | 0.006                | 0.120   | (-0.001, 0.013)  | 0.8             | 0.450   | (0.4, 1.5)  | 0.6 (1)              | 0.450           | -0.005          |
| Living with friend(s)/housemate(s)                | No                        | Yes                         | 2.8              | <0.001   | (1.6, 4.9)  | 0.035                | 0.0180  | (0.006, 0.063)   | 1.1             | 0.890   | (0.5, 2.5)  | 0.0 (1)              | 0.890           | 0.001           |
| Urban/Rural area                                  | Rural                     | Urban                       | 1.1              | 0.800    | (0.6, 1.8)  | 0.001                | 0.790   | (-0.009, 0.012)  | 0.8             | 0.430   | (0.5, 1.4)  | 2.3 (2)              | 0.320           | -0.005          |
|                                                   |                           | Town/Fringe                 | 0.7              | 0.330    | (0.3, 1.5)  | -0.006               | 0.330   | (-0.019, 0.006)  | 0.6             | 0.130   | (0.3, 1.2)  |                      | -0.011          | 0.140           |
| Wave × Loneliness                                 | Wave 3, Not lonely        | Wave 4 × Lonely             | -                | -( -,- ) | -           | -( -,- )             | 1.3     | 0.420            | (0.7, 2.7)      | 0.6 (1) | 0.420       | 0.006                | 0.440           | (-0.009, 0.020) |
| Wave × Coping                                     | Wave 3, NA (no stress)    | Wave 4 × Well               | -                | -( -,- ) | -           | -( -,- )             | 3.5     | 0.300            | (0.3, 36.1)     | 1.1 (2) | 0.570       | 0.006                | 0.380           | (-0.007, 0.019) |
|                                                   |                           | Wave 4 × Not well           | -                | -( -,- ) | -           | -( -,- )             | 3.6     | 0.290            | (0.3, 37.3)     |         | 0.004       | 0.800                | (-0.024, 0.031) |                 |
| Wave × Sex                                        | Wave 3, Male              | Wave 4 × Female             | -                | -( -,- ) | -           | -( -,- )             | 0.8     | 0.430            | (0.4, 1.5)      | 0.6 (1) | 0.430       | -0.006               | 0.420           | (-0.020, 0.008) |
| Wave × Age                                        | Wave 3, 55+               | Wave 4 × 18-24              | -                | -( -,- ) | -           | -( -,- )             | 0.9     | 0.940            | (0.2, 3.8)      | 4.2 (4) | 0.380       | -0.007               | 0.690           | (-0.044, 0.029) |
|                                                   |                           | Wave 4 × 25-34              | -                | -( -,- ) | -           | -( -,- )             | 1.2     | 0.840            | (0.3, 4.4)      |         | 0.001       | 0.950                | (-0.023, 0.025) |                 |
|                                                   |                           | Wave 4 × 35-44              | -                | -( -,- ) | -           | -( -,- )             | 0.6     | 0.400            | (0.2, 2.1)      |         | -0.014      | 0.140                | (-0.033, 0.005) |                 |
|                                                   |                           | Wave 4 × 45-54              | -                | -( -,- ) | -           | -( -,- )             | 1.8     | 0.420            | (0.4, 7.5)      |         | 0.007       | 0.350                | (-0.008, 0.023) |                 |
| Wave × Working status                             | Wave 3, Employed          | Wave 4 × Unemployed         | -                | -( -,- ) | -           | -( -,- )             | 1.7     | 0.400            | (0.5, 6.3)      | 3.0 (4) | 0.570       | 0.010                | 0.420           | (-0.015, 0.035) |
|                                                   |                           | Wave 4 × Not working/Others | -                | -( -,- ) | -           | -( -,- )             | 1.3     | 0.590            | (0.5, 3.2)      |         | 0.004       | 0.710                | (-0.018, 0.027) |                 |
|                                                   |                           | Wave 4 × Full time student  | -                | -( -,- ) | -           | -( -,- )             | 2.3     | 0.130            | (0.8, 6.8)      |         | 0.021       | 0.160                | (-0.008, 0.051) |                 |
|                                                   |                           | Wave 4 × Retired            | -                | -( -,- ) | -           | -( -,- )             | 0.7     | 0.690            | (0.1, 4.0)      |         | -0.003      | 0.800                | (-0.026, 0.020) |                 |

\* Based on Wald chi-square test; df: degree of freedom

Suppl. Table 12. Summary of binomial regression of suicidal thoughts for combining data collected at wave 2, wave 3 and wave 4 as sensitivity analysis.

| Variable                        | Reference                 | Category                    | Unadjusted model |                     |        |                           |         |                     | Adjusted model  |         |        |                           |           |                      |         |        |                     |         |
|---------------------------------|---------------------------|-----------------------------|------------------|---------------------|--------|---------------------------|---------|---------------------|-----------------|---------|--------|---------------------------|-----------|----------------------|---------|--------|---------------------|---------|
|                                 |                           |                             | Risk Ratio (RR)  |                     |        | Risk Difference (RD)      |         |                     | Risk Ratio (RR) |         |        | Effect of variable*       |           | Risk Difference (RD) |         |        | Effect of variable* |         |
|                                 |                           |                             | RR               | p-value             | 95% CI | RD                        | p-value | 95% CI              | RR              | p-value | 95% CI | $\chi^2$ (df)             | p-value   | RD                   | p-value | 95% CI | $\chi^2$ (df)       | p-value |
| Wave                            | Wave 2                    | Wave 3                      | 1.2              | 0.038 ( 1.0, 1.5 )  | 0.017  | 0.032 ( 0.001, 0.032 )    | 1.2     | 0.180 ( 0.9, 1.6 )  | 2.0 (2)         | 0.370   | 0.010  | 0.190 ( -0.005, 0.024 )   | 3.8 (2)   | 0.150                |         |        |                     |         |
|                                 |                           | Wave 4                      | 1.3              | 0.002 ( 1.1, 1.6 )  | 0.023  | 0.004 ( 0.008, 0.039 )    | 1.1     | 0.610 ( 0.8, 1.4 )  |                 |         | 0.014  | 0.052 ( 0.000, 0.029 )    |           |                      |         |        |                     |         |
| Loneliness                      | No                        | Yes                         | 4.3              | <0.001 ( 3.7, 4.9 ) | 0.167  | <0.001 ( 0.149, 0.185 )   | 2.0     | <0.001 ( 1.7, 2.3 ) | 71.2 (1)        | <0.001  | 0.063  | <0.001 ( 0.048, 0.079 )   | 67.1 (1)  | <0.001               |         |        |                     |         |
| Coping                          | Well                      | NA (no stress)              | 0.3              | <0.001 ( 0.2, 0.4 ) | -0.042 | <0.001 ( -0.052, -0.033 ) | 0.3     | <0.001 ( 0.2, 0.6 ) | 376.9 (2)       | <0.001  | -0.040 | <0.001 ( -0.052, -0.028 ) | 252.7 (2) | <0.001               |         |        |                     |         |
|                                 |                           | Not well                    | 6.3              | <0.001 ( 5.6, 7.2 ) | 0.312  | <0.001 ( 0.283, 0.341 )   | 4.2     | <0.001 ( 3.6, 4.8 ) |                 |         | 0.191  | <0.001 ( 0.165, 0.217 )   |           |                      |         |        |                     |         |
| Sex                             | Male                      | Female                      | 1.2              | 0.002 ( 1.1, 1.4 )  | 0.020  | 0.002 ( 0.007, 0.032 )    | 1.0     | 0.560 ( 0.9, 1.2 )  | 0.3 (1)         | 0.560   | 0.004  | 0.450 ( -0.007, 0.016 )   | 0.6 (1)   | 0.450                |         |        |                     |         |
| Age (years)                     | 55+                       | 18-24                       | 4.2              | <0.001 ( 3.4, 5.1 ) | 0.147  | <0.001 ( 0.117, 0.176 )   | 1.6     | 0.004 ( 1.2, 2.3 )  | 12.1 (4)        | 0.017   | 0.043  | 0.004 ( 0.014, 0.072 )    | 13.2 (4)  | 0.010                |         |        |                     |         |
|                                 |                           | 25-34                       | 3.1              | <0.001 ( 2.6, 3.8 ) | 0.099  | <0.001 ( 0.078, 0.119 )   | 1.6     | <0.001 ( 1.2, 2.2 ) |                 |         | 0.042  | <0.001 ( 0.018, 0.066 )   |           |                      |         |        |                     |         |
|                                 |                           | 35-44                       | 2.5              | <0.001 ( 2.0, 3.0 ) | 0.068  | <0.001 ( 0.050, 0.085 )   | 1.6     | 0.002 ( 1.2, 2.1 )  |                 |         | 0.037  | 0.001 ( 0.014, 0.060 )    |           |                      |         |        |                     |         |
|                                 |                           | 45-54                       | 1.8              | <0.001 ( 1.4, 2.2 ) | 0.036  | <0.001 ( 0.021, 0.051 )   | 1.4     | 0.023 ( 1.0, 1.8 )  |                 |         | 0.024  | 0.023 ( 0.003, 0.045 )    |           |                      |         |        |                     |         |
| Social grade                    | ABC1                      | C2DE                        | 1.2              | <0.001 ( 1.0, 1.4 ) | 0.017  | 0.010 ( 0.004, 0.030 )    | 1.1     | 0.110 ( 1.0, 1.2 )  | 2.5 (1)         | 0.110   | 0.009  | 0.110 ( -0.002, 0.021 )   | 2.5 (1)   | 0.110                |         |        |                     |         |
| Marital status                  | Married/Civil Partnership | Living as married           | 1.6              | <0.001 ( 1.2, 2.0 ) | 0.031  | 0.001 ( 0.012, 0.049 )    | 1.0     | 0.920 ( 0.8, 1.3 )  | 15.3 (4)        | 0.004   | 0.001  | 0.920 ( -0.017, 0.019 )   | 15.6 (4)  | 0.004                |         |        |                     |         |
|                                 |                           | Separated/ Divorced         | 1.9              | <0.001 ( 1.5, 2.3 ) | 0.047  | <0.001 ( 0.026, 0.069 )   | 1.4     | 0.007 ( 1.1, 1.7 )  |                 |         | 0.029  | 0.013 ( 0.006, 0.052 )    |           |                      |         |        |                     |         |
|                                 |                           | Widowed                     | 0.8              | 0.420 ( 0.5, 1.3 )  | -0.010 | 0.380 ( -0.033, 0.013 )   | 0.9     | 0.660 ( 0.5, 1.5 )  |                 |         | -0.008 | 0.640 ( -0.044, 0.027 )   |           |                      |         |        |                     |         |
|                                 |                           | Never Married               | 2.9              | <0.001 ( 2.5, 3.4 ) | 0.107  | <0.001 ( 0.090, 0.124 )   | 1.3     | 0.005 ( 1.1, 1.6 )  |                 |         | 0.024  | 0.005 ( 0.008, 0.041 )    |           |                      |         |        |                     |         |
| Working status                  | Employed                  | Unemployed                  | 2.3              | <0.001 ( 1.8, 2.9 ) | 0.116  | <0.001 ( 0.071, 0.161 )   | 1.2     | 0.026 ( 1.0, 1.5 )  | 13.2 (4)        | 0.010   | 0.023  | 0.019 ( 0.004, 0.041 )    | 12.6 (4)  | 0.014                |         |        |                     |         |
|                                 |                           | Not working/Others          | 1.7              | <0.001 ( 1.4, 2.0 ) | 0.062  | <0.001 ( 0.038, 0.086 )   | 1.3     | <0.001 ( 1.1, 1.5 ) |                 |         | 0.026  | 0.002 ( 0.009, 0.042 )    |           |                      |         |        |                     |         |
|                                 |                           | Full time student           | 2.0              | <0.001 ( 1.6, 2.6 ) | 0.094  | <0.001 ( 0.055, 0.133 )   | 1.1     | 0.680 ( 0.8, 1.3 )  |                 |         | 0.006  | 0.610 ( -0.016, 0.027 )   |           |                      |         |        |                     |         |
|                                 |                           | Retired                     | 0.5              | <0.001 ( 0.4, 0.6 ) | -0.049 | <0.001 ( -0.060, -0.037 ) | 1.1     | 0.580 ( 0.8, 1.5 )  |                 |         | 0.009  | 0.530 ( -0.019, 0.037 )   |           |                      |         |        |                     |         |
| Being parent/guardian           | No                        | Yes                         | 0.5              | <0.001 ( 0.4, 0.6 ) | -0.064 | <0.001 ( -0.076, -0.051 ) | 0.9     | 0.180 ( 0.7, 1.1 )  | 1.8 (1)         | 0.180   | -0.012 | 0.180 ( -0.030, 0.006 )   | 1.8 (1)   | 0.180                |         |        |                     |         |
| Number of children in household | 0                         | 1                           | 1.2              | 0.079 ( 1.0, 1.5 )  | 0.018  | 0.099 ( -0.003, 0.039 )   | 1.0     | 0.940 ( 0.8, 1.2 )  | 0.8 (3)         | 0.850   | -0.001 | 0.940 ( -0.020, 0.018 )   | 0.9 (3)   | 0.830                |         |        |                     |         |
|                                 |                           | 2                           | 1.0              | 0.690 ( 0.8, 1.3 )  | 0.004  | 0.690 ( -0.017, 0.025 )   | 1.0     | 0.76 ( 0.8, 1.3 )   |                 |         | 0.004  | 0.760 ( -0.020, 0.027 )   |           |                      |         |        |                     |         |
|                                 |                           | 3+                          | 1.0              | 0.900 ( 0.7, 1.5 )  | 0.002  | 0.900 ( -0.033, 0.037 )   | 0.9     | 0.470 ( 0.6, 1.3 )  |                 |         | -0.011 | 0.450 ( -0.041, 0.018 )   |           |                      |         |        |                     |         |
| Wave × Loneliness               | Wave 2, Not lonely        | Wave 3 × Lonely             | -                | - ( -,- )           | -      | - ( -,- )                 | 1.0     | 0.900 ( 0.7, 1.6 )  | 0.3 (2)         | 0.860   | 0.009  | 0.650 ( -0.031, 0.049 )   | 0.3 (2)   | 0.880                |         |        |                     |         |
|                                 |                           | Wave 4 × Lonely             | -                | - ( -,- )           | -      | - ( -,- )                 | 0.9     | 0.780 ( 0.6, 1.5 )  |                 |         | 0.003  | 0.890 ( -0.037, 0.043 )   |           |                      |         |        |                     |         |
| Wave × Coping                   | Wave 2, NA (no stress)    | Wave 3 × Well               | -                | - ( -,- )           | -      | - ( -,- )                 | 1.0     | 0.990 ( 0.3, 3.3 )  | 1.7 (4)         | 0.800   | 0.004  | 0.820 ( -0.029, 0.037 )   | 3.1 (4)   | 0.550                |         |        |                     |         |
|                                 |                           | Wave 3 × Not well           | -                | - ( -,- )           | -      | - ( -,- )                 | 1.0     | 0.940 ( 0.3, 3.3 )  |                 |         | 0.019  | 0.640 ( -0.060, 0.098 )   |           |                      |         |        |                     |         |
|                                 |                           | Wave 4 × Well               | -                | - ( -,- )           | -      | - ( -,- )                 | 2.2     | 0.310 ( 0.5, 9.9 )  |                 |         | 0.021  | 0.190 ( -0.011, 0.054 )   |           |                      |         |        |                     |         |
|                                 |                           | Wave 4 × Not well           | -                | - ( -,- )           | -      | - ( -,- )                 | 2.1     | 0.350 ( 0.4, 10.0 ) |                 |         | 0.044  | 0.260 ( -0.032, 0.121 )   |           |                      |         |        |                     |         |
| Wave × Sex                      | Wave 2, Male              | Wave 3 × Female             | -                | - ( -,- )           | -      | - ( -,- )                 | 1.4     | 0.093 ( 0.9, 2.0 )  | 9.0 (2)         | 0.011   | 0.026  | 0.120 ( -0.006, 0.058 )   | 8.9 (2)   | 0.012                |         |        |                     |         |
|                                 |                           | Wave 4 × Female             | -                | - ( -,- )           | -      | - ( -,- )                 | 1.7     | 0.004 ( 1.2, 2.5 )  |                 |         | 0.047  | 0.004 ( 0.015, 0.079 )    |           |                      |         |        |                     |         |
| Wave × Age                      | Wave 2, 55+               | Wave 3 × 18-24              | -                | - ( -,- )           | -      | - ( -,- )                 | 1.2     | 0.70 ( 0.5, 3.2 )   | 8.3 (8)         | 0.410   | 0.028  | 0.440 ( -0.042, 0.098 )   | 7.7 (8)   | 0.470                |         |        |                     |         |
|                                 |                           | Wave 3 × 25-34              | -                | - ( -,- )           | -      | - ( -,- )                 | 1.1     | 0.87 ( 0.5, 2.4 )   |                 |         | 0.015  | 0.580 ( -0.039, 0.070 )   |           |                      |         |        |                     |         |
|                                 |                           | Wave 3 × 35-44              | -                | - ( -,- )           | -      | - ( -,- )                 | 0.7     | 0.35 ( 0.3, 1.5 )   |                 |         | -0.027 | 0.380 ( -0.087, 0.033 )   |           |                      |         |        |                     |         |
|                                 |                           | Wave 3 × 45-54              | -                | - ( -,- )           | -      | - ( -,- )                 | 0.6     | 0.21 ( 0.3, 1.3 )   |                 |         | -0.039 | 0.210 ( -0.101, 0.022 )   |           |                      |         |        |                     |         |
|                                 |                           | Wave 4 × 18-24              | -                | - ( -,- )           | -      | - ( -,- )                 | 1.0     | 0.95 ( 0.4, 2.7 )   |                 |         | 0.014  | 0.700 ( -0.055, 0.082 )   |           |                      |         |        |                     |         |
|                                 |                           | Wave 4 × 25-34              | -                | - ( -,- )           | -      | - ( -,- )                 | 1.0     | 0.99 ( 0.5, 2.1 )   |                 |         | 0.012  | 0.660 ( -0.041, 0.065 )   |           |                      |         |        |                     |         |
|                                 |                           | Wave 4 × 35-44              | -                | - ( -,- )           | -      | - ( -,- )                 | 0.6     | 0.21 ( 0.3, 1.3 )   |                 |         | -0.035 | 0.240 ( -0.094, 0.024 )   |           |                      |         |        |                     |         |
|                                 |                           | Wave 4 × 45-54              | -                | - ( -,- )           | -      | - ( -,- )                 | 0.6     | 0.16 ( 0.3, 1.2 )   |                 |         | -0.042 | 0.180 ( -0.102, 0.019 )   |           |                      |         |        |                     |         |
| Wave × Working status           | Wave 2, Employed          | Wave 3 × Unemployed         | -                | - ( -,- )           | -      | - ( -,- )                 | 1.0     | 0.93 ( 0.6, 1.9 )   | 10.5 (8)        | 0.230   | 0.003  | 0.900 ( -0.045, 0.051 )   | 10.4 (8)  | 0.240                |         |        |                     |         |
|                                 |                           | Wave 3 × Not working/Others | -                | - ( -,- )           | -      | - ( -,- )                 | 0.7     | 0.18 ( 0.5, 1.2 )   |                 |         | -0.030 | 0.250 ( -0.080, 0.021 )   |           |                      |         |        |                     |         |
|                                 |                           | Wave 3 × Full time student  | -                | - ( -,- )           | -      | - ( -,- )                 | 0.7     | 0.34 ( 0.3, 1.6 )   |                 |         | -0.035 | 0.380 ( -0.112, 0.043 )   |           |                      |         |        |                     |         |
|                                 |                           | Wave 3 × Retired            | -                | - ( -,- )           | -      | - ( -,- )                 | 1.2     | 0.75 ( 0.5, 2.8 )   |                 |         | 0.019  | 0.640 ( -0.062, 0.101 )   |           |                      |         |        |                     |         |
|                                 |                           | Wave 4 × Unemployed         | -                | - ( -,- )           | -      | - ( -,- )                 | 1.4     | 0.24 ( 0.8, 2.5 )   |                 |         | 0.039  | 0.110 ( -0.009, 0.088 )   |           |                      |         |        |                     |         |
|                                 |                           | Wave 4 × Not working/Others | -                | - ( -,- )           | -      | - ( -,- )                 | 0.7     | 0.17 ( 0.5, 1.1 )   |                 |         | -0.029 | 0.270 ( -0.079, 0.022 )   |           |                      |         |        |                     |         |
|                                 |                           | Wave 4 × Full time student  | -                | - ( -,- )           | -      | - ( -,- )                 | 0.9     | 0.80 ( 0.4, 2.1 )   |                 |         | -0.006 | 0.880 ( -0.085, 0.073 )   |           |                      |         |        |                     |         |
|                                 |                           | Wave 4 × Retired            | -                | - ( -,- )           | -      | - ( -,- )                 | 0.7     | 0.38 ( 0.3, 1.6 )   |                 |         | -0.031 | 0.390 ( -0.102, 0.040 )   |           |                      |         |        |                     |         |

\* Based on Wald chi-square test; df: degree of freedom

Suppl. Table 13. Summary of binomial regression of self-harm for combining data collected at wave 2, wave 3 and wave 4 as sensitivity analysis\*.

| Variable                        | Reference                 | Category                    | Unadjusted model |         |            |                      |         |                 | Adjusted model  |         |            |                     |         |        |                      |                 |          |                     |  |  |
|---------------------------------|---------------------------|-----------------------------|------------------|---------|------------|----------------------|---------|-----------------|-----------------|---------|------------|---------------------|---------|--------|----------------------|-----------------|----------|---------------------|--|--|
|                                 |                           |                             | Risk Ratio (RR)  |         |            | Risk Difference (RD) |         |                 | Risk Ratio (RR) |         |            | Effect of variable† |         |        | Risk Difference (RD) |                 |          | Effect of variable† |  |  |
|                                 |                           |                             | RR               | p-value | 95% CI     | RD                   | p-value | 95% CI          | RR              | p-value | 95% CI     | χ² (df)             | p-value | RD     | p-value              | 95% CI          | χ² (df)  | p-value             |  |  |
| Wave                            | Wave 2                    | Wave 3                      | 1.2              | 0.420(  | 0.8,1.8 )  | 0.003                | 0.400(  | -0.005,0.011 )  | 1.5             | 0.210(  | 0.8,2.6 )  | 3.4 (2)             | 0.190   | 0.002  | 0.600(               | -0.006,0.010 )  | 0.6 (2)  | 0.740               |  |  |
|                                 |                           | Wave 4                      | 1.0              | 0.970(  | 0.7,1.5 )  | 0.000                | 0.970(  | -0.008,0.008 )  | 0.9             | 0.860(  | 0.5,1.8 )  |                     |         | 0.000  | 0.950(               | -0.008,0.008 )  |          |                     |  |  |
| Loneliness                      | No                        | Yes                         | 3.4              | <0.001( | 2.5,4.5 )  | 0.030                | <0.001( | 0.020,0.039 )   | 1.5             | 0.032(  | 1.0,2.0 )  | 4.6 (1)             | 0.032   | 0.007  | 0.044(               | 0.000,0.014 )   | 4.1 (1)  | 0.044               |  |  |
| Coping                          | Well                      | NA (no stress)              | 0.3              | 0.027(  | 0.1,0.9 )  | -0.007               | <0.001( | -0.011,-0.003 ) | 0.4             | 0.130(  | 0.2,1.3 )  | 113.8 (2)           | <0.001  | -0.006 | 0.034(               | -0.011,-0.000 ) | 59.4 (2) | <0.001              |  |  |
|                                 |                           | Not well                    | 9.1              | <0.001( | 6.6,12.4 ) | 0.082                | <0.001( | 0.064,0.099 )   | 6.1             | <0.001( | 4.3,8.6 )  |                     |         | 0.052  | <0.001(              | 0.038,0.066 )   |          |                     |  |  |
| Sex                             | Male                      | Female                      | 1.4              | 0.026(  | 1.0,2.0 )  | 0.007                | 0.020(  | 0.001,0.013 )   | 1.1             | 0.620(  | 0.8,1.5 )  | 0.2 (1)             | 0.620   | 0.002  | 0.590(               | -0.005,0.008 )  | 0.3 (1)  | 0.590               |  |  |
| Age (years)                     | 55+                       | 18-24                       | 9.8              | <0.001( | 5.9,16.2 ) | 0.048                | <0.001( | 0.032,0.064 )   | 4.4             | <0.001( | 1.9,9.9 )  | 16.1 (4)            | 0.003   | 0.027  | 0.006(               | 0.008,0.045 )   | 16.7 (4) | 0.002               |  |  |
|                                 |                           | 25-34                       | 6.5              | <0.001( | 3.9,10.7 ) | 0.030                | <0.001( | 0.020,0.041 )   | 3.6             | <0.001( | 1.8,7.3 )  |                     |         | 0.020  | <0.001(              | 0.009,0.032 )   |          |                     |  |  |
|                                 |                           | 35-44                       | 4.5              | <0.001( | 2.7,7.5 )  | 0.019                | <0.001( | 0.011,0.027 )   | 2.6             | 0.006(  | 1.3,5.2 )  |                     |         | 0.014  | 0.003(               | 0.004,0.023 )   |          |                     |  |  |
|                                 |                           | 45-54                       | 2.8              | <0.001( | 1.6,4.9 )  | 0.010                | 0.003(  | 0.003,0.016 )   | 1.7             | 0.120(  | 0.9,3.4 )  |                     |         | 0.006  | 0.110(               | -0.001,0.013 )  |          |                     |  |  |
| Social grade                    | ABC1                      | C2DE                        | 1.3              | 0.110(  | 0.9,1.7 )  | 0.005                | 0.120(  | -0.001,0.011 )  | 1.2             | 0.230(  | 0.9,1.8 )  | 1.5 (1)             | 0.230   | 0.004  | 0.240(               | -0.003,0.011 )  | 1.4 (1)  | 0.240               |  |  |
| Marital status                  | Married/Civil Partnership | Living as married           | 2.2              | <0.001( | 1.4,3.6 )  | 0.014                | 0.007(  | 0.004,0.023 )   | 1.2             | 0.430(  | 0.7,2.1 )  | 3.0 (4)             | 0.550   | 0.004  | 0.440(               | -0.006,0.015 )  | 4.1 (4)  | 0.390               |  |  |
|                                 |                           | Separated/ Divorced         | 1.7              | 0.051(  | 1.0,3.0 )  | 0.008                | 0.097(  | -0.001,0.018 )  | 1.5             | 0.180(  | 0.8,2.7 )  |                     |         | 0.009  | 0.230(               | -0.006,0.024 )  |          |                     |  |  |
|                                 |                           | Widowed                     | 0.3              | 0.180(  | 0.0,1.9 )  | -0.008               | 0.012(  | -0.015,-0.002 ) | 0.4             | 0.430(  | 0.1,3.3 )  |                     |         | -0.010 | 0.250(               | -0.026,0.007 )  |          |                     |  |  |
|                                 |                           | Never Married               | 3.2              | <0.001( | 2.2,4.5 )  | 0.024                | <0.001( | 0.016,0.032 )   | 1.1             | 0.640(  | 0.7,1.8 )  |                     |         | 0.002  | 0.640(               | -0.007,0.011 )  |          |                     |  |  |
| Working status                  | Employed                  | Unemployed                  | 2.5              | <0.001( | 1.5,4.2 )  | 0.026                | 0.017(  | 0.005,0.048 )   | 1.4             | 0.290(  | 0.8,2.5 )  | 8.8 (4)             | 0.066   | 0.006  | 0.340(               | -0.007,0.019 )  | 7.5 (4)  | 0.110               |  |  |
|                                 |                           | Not working/Others          | 2.2              | <0.001( | 1.5,3.2 )  | 0.021                | 0.001(  | 0.008,0.034 )   | 1.7             | 0.017(  | 1.1,2.6 )  |                     |         | 0.011  | 0.041(               | 0.000,0.022 )   |          |                     |  |  |
|                                 |                           | Full time student           | 3.5              | <0.001( | 2.3,5.4 )  | 0.045                | <0.001( | 0.022,0.068 )   | 1.7             | 0.056(  | 1.0,3.0 )  |                     |         | 0.012  | 0.093(               | -0.002,0.027 )  |          |                     |  |  |
|                                 |                           | Retired                     | 0.2              | <0.001( | 0.1,0.4 )  | -0.014               | <0.001( | -0.018,-0.009 ) | 0.8             | 0.520(  | 0.3,1.7 )  |                     |         | -0.003 | 0.550(               | -0.014,0.007 )  |          |                     |  |  |
| Being parent/guardian           | No                        | Yes                         | 0.5              | <0.001( | 0.4,0.7 )  | -0.015               | <0.001( | -0.021,-0.008 ) | 1.2             | 0.560(  | 0.7,2.0 )  | 0.3 (1)             | 0.560   | 0.003  | 0.570(               | -0.008,0.014 )  | 0.3 (1)  | 0.570               |  |  |
| Number of children in household | 0                         | 1                           | 1.3              | 0.200(  | 0.9,2.1 )  | 0.006                | 0.250(  | -0.004,0.017 )  | 0.8             | 0.450(  | 0.4,1.4 )  | 1.1 (3)             | 0.770   | -0.004 | 0.420(               | -0.014,0.006 )  | 1.2 (3)  | 0.760               |  |  |
|                                 |                           | 2                           | 1.2              | 0.560(  | 0.7,1.9 )  | 0.003                | 0.580(  | -0.008,0.013 )  | 0.9             | 0.720(  | 0.5,1.6 )  |                     |         | -0.002 | 0.720(               | -0.013,0.009 )  |          |                     |  |  |
|                                 |                           | 3+                          | 1.8              | 0.080(  | 0.9,3.3 )  | 0.014                | 0.170(  | -0.006,0.034 )  | 1.2             | 0.67(   | 0.6,2.3 )  |                     |         | 0.003  | 0.690(               | -0.012,0.019 )  |          |                     |  |  |
| Wave × Loneliness               | Wave 2, Not lonely        | Wave 3 × Lonely             | -                | -(      | -,- )      | -                    | -(      | -,- )           | 0.4             | 0.055(  | 0.2,1.0 )  | 3.7 (2)             | 0.160   | -0.016 | 0.083(               | -0.035,0.002 )  | 3.0 (2)  | 0.220               |  |  |
|                                 |                           | Wave 4 × Lonely             | -                | -(      | -,- )      | -                    | -(      | -,- )           | 0.5             | 0.190(  | 0.2,1.4 )  |                     |         | -0.011 | 0.220(               | -0.030,0.007 )  |          |                     |  |  |
| Wave × Sex                      | Wave 2, Male              | Wave 3 × Female             | -                | -(      | -,- )      | -                    | -(      | -,- )           | 1.5             | 0.380(  | 0.6,3.7 )  | 0.8 (2)             | 0.670   | 0.008  | 0.380(               | -0.010,0.027 )  | 0.8 (2)  | 0.670               |  |  |
|                                 |                           | Wave 4 × Female             | -                | -(      | -,- )      | -                    | -(      | -,- )           | 1.3             | 0.580(  | 0.5,3.3 )  |                     |         | 0.005  | 0.590(               | -0.013,0.024 )  |          |                     |  |  |
| Wave × Age                      | Wave 2, 55+               | Wave 3 × 18-24              | -                | -(      | -,- )      | -                    | -(      | -,- )           | 2.7             | 0.300(  | 0.4,18.2 ) | 6.3 (8)             | 0.620   | 0.023  | 0.280(               | -0.018,0.064 )  | 6.8 (8)  | 0.560               |  |  |
|                                 |                           | Wave 3 × 25-34              | -                | -(      | -,- )      | -                    | -(      | -,- )           | 2.0             | 0.410(  | 0.4,10.3 ) |                     |         | 0.012  | 0.410(               | -0.017,0.042 )  |          |                     |  |  |
|                                 |                           | Wave 3 × 35-44              | -                | -(      | -,- )      | -                    | -(      | -,- )           | 1.5             | 0.610(  | 0.3,7.2 )  |                     |         | 0.005  | 0.750(               | -0.024,0.034 )  |          |                     |  |  |
|                                 |                           | Wave 3 × 45-54              | -                | -(      | -,- )      | -                    | -(      | -,- )           | 1.9             | 0.520(  | 0.3,14.2 ) |                     |         | 0.007  | 0.520(               | -0.014,0.028 )  |          |                     |  |  |
|                                 |                           | Wave 4 × 18-24              | -                | -(      | -,- )      | -                    | -(      | -,- )           | 3.1             | 0.240(  | 0.5,20.4 ) |                     |         | 0.018  | 0.300(               | -0.016,0.052 )  |          |                     |  |  |
|                                 |                           | Wave 4 × 25-34              | -                | -(      | -,- )      | -                    | -(      | -,- )           | 2.3             | 0.330(  | 0.4,12.5 ) |                     |         | 0.010  | 0.500(               | -0.018,0.038 )  |          |                     |  |  |
|                                 |                           | Wave 4 × 35-44              | -                | -(      | -,- )      | -                    | -(      | -,- )           | 1.0             | 0.980(  | 0.2,5.4 )  |                     |         | -0.007 | 0.580(               | -0.034,0.019 )  |          |                     |  |  |
|                                 |                           | Wave 4 × 45-54              | -                | -(      | -,- )      | -                    | -(      | -,- )           | 3.8             | 0.190(  | 0.5,27.6 ) |                     |         | 0.014  | 0.190(               | -0.007,0.036 )  |          |                     |  |  |
| Wave × Working status           | Wave 2, Employed          | Wave 3 × Unemployed         | -                | -(      | -,- )      | -                    | -(      | -,- )           | 0.4             | 0.170(  | 0.1,1.5 )  | 4.0 (8)             | 0.860   | -0.021 | 0.250(               | -0.058,0.015 )  | 3.5 (8)  | 0.900               |  |  |
|                                 |                           | Wave 3 × Not working/Others | -                | -(      | -,- )      | -                    | -(      | -,- )           | 0.6             | 0.360(  | 0.2,1.7 )  |                     |         | -0.009 | 0.510(               | -0.035,0.017 )  |          |                     |  |  |
|                                 |                           | Wave 3 × Full time student  | -                | -(      | -,- )      | -                    | -(      | -,- )           | 0.4             | 0.320(  | 0.1,2.3 )  |                     |         | -0.019 | 0.420(               | -0.064,0.027 )  |          |                     |  |  |
|                                 |                           | Wave 3 × Retired            | -                | -(      | -,- )      | -                    | -(      | -,- )           | 0.9             | 0.950(  | 0.1,6.2 )  |                     |         | -0.001 | 0.930(               | -0.030,0.027 )  |          |                     |  |  |
|                                 |                           | Wave 4 × Unemployed         | -                | -(      | -,- )      | -                    | -(      | -,- )           | 0.7             | 0.600(  | 0.2,2.8 )  |                     |         | -0.010 | 0.610(               | -0.048,0.028 )  |          |                     |  |  |
|                                 |                           | Wave 4 × Not working/Others | -                | -(      | -,- )      | -                    | -(      | -,- )           | 0.9             | 0.830(  | 0.3,2.5 )  |                     |         | -0.003 | 0.840(               | -0.028,0.023 )  |          |                     |  |  |
|                                 |                           | Wave 4 × Full time student  | -                | -(      | -,- )      | -                    | -(      | -,- )           | 1.0             | 0.960(  | 0.2,5.0 )  |                     |         | 0.002  | 0.930(               | -0.044,0.049 )  |          |                     |  |  |
|                                 |                           | Wave 4 × Retired            | -                | -(      | -,- )      | -                    | -(      | -,- )           | 0.6             | 0.670(  | 0.1,5.0 )  |                     |         | -0.005 | 0.680(               | -0.029,0.019 )  |          |                     |  |  |

\* Wave × Coping interaction is not included due to 0 counts in the coping subgroup  
† Based on Wald chi-square test; df: degree of freedom
